# Supplementary material for: Comprehensive AI Model Development for Gleason Grading:From Scanning, Cloud-based Annotation to Pathologist-AI Interaction
Source: Research Square preprint supplement (doi:10.21203/rs.3.rs-1917695/v1), 2022-09-22
Supplement: Supplementary file 1 [file 2fcace92f906442934f9c55d.pdf]

1 **Supplementary Contents**

2

3

4 Section 1: A!magQC.....2

5 Section 2: A!HistoNotes .....4

6 Section 3: Evaluation Metrics of AI model Performance on image dataset .....6

7 Section 4: Clinical Validation of AI-assisted diagnosis .....7

8 Section 5: Pathologist-AI Interaction via A!HistoNotes .....8

9 Supplementary Figure..... 10

10 A!magQC User Guide

11 A!HistoNotes User Guide

## 12 **Section 1: A!magQC**

13 With the Increasing development of Digital Pathology, a large amount of data is generated  
14 every day. There are some common quality issues (as shown in Supplementary Figure 1A) and  
15 the visual quality control of those images as become a tedious and heavy workload for  
16 researchers. The assessment of quality of an image is an active field of research; a perceptual  
17 image quality estimator calculates the no-reference image quality score for an image using a  
18 perception-based image quality evaluator (PIQE). However, this approach reveals to be more  
19 efficient on natural image compared to Histological images. Some tools have been developed  
20 for Histological images previously but restrict the “Quality evaluation” to only Hematoxylin  
21 &Eosin (H&E) images.

22

23 Therefore, A!magQC was developed to provide fully automatic quality control for any  
24 histologically relevant imaging modality (Haematoxylin and Eosin (H&E),  
25 ImmunoHistochemistry (IHC) and Multiplexed Fluorescence (MF)). The software  
26 automatically detects the image size (magnification) and type (H&E or MF) from the metadata  
27 of each image files. The interface is shown in Supplementary Figure 1B.

28

29 The First step in assessing the quality of the tissue Image is to detect the tissue and separate it  
30 from the background. To do so, an adaptive thresholding is applied. We approach the quality  
31 of the tissue at a local level using a parallel analysis of tiles of 256\*256 pixels throughout the  
32 Region of Interest (i.e., tissue detected). Five relevant features are identified to differentiate  
33 local quality in whole slide images, as shown in Supplementary Figure 1C.

- 34 • Focus: We quantify the focus in an image using the Variance of the Laplacian  
35 Transform. The Laplacian operator measure the second derivative of an image.  
36 Therefore, it highlights regions of an image with sharp intensity changes. High variance

37 of intensity change (i.e., sharp and smooth changes) is representative of a normal, in-  
38 focus image. On the contrary, Low variance indicates an image with few sharp edges,  
39 typically an out of focus image.

40 • Contrast: We quantify the Contrast by measuring the Difference of the Top 1% of high  
41 values positive pixels and the Bottom 1% of low values positive pixels in each tile. The  
42 range must be high enough for good separation of nuclei signal and background.

43 • Saturation: We measure the percentage of pixels that have an intensity max value (i.e.,  
44 digital image pixels are 8 bits unsigned integer; hence, the max intensity value is 255.)

45 • Artifacts: The main structure of interest in Histology images is usually the nuclei. The  
46 morphological open operation is an erosion followed by a dilation, using the same  
47 structuring element for both operations. We perform an image opening using a  
48 structuring element or kernel, bigger than the average nuclei size will highlights dirt  
49 and blurry objects that sometimes are contained in the images.

50 • Texture Uniformity: Computing the GLCM (the Gray Level Co-occurrence Matrix  
51 calculates how often a pixel with gray-level (grayscale intensity) value “i” occurs  
52 horizontally adjacent to a pixel with the value “j”). Measuring the Uniformity of the  
53 pixels allows us to highlight region with different density of nuclei. Notably visceral  
54 fat tissue surrounding organs of interest often have a very different texture.

55 The pipeline was designed on multiplexed fluorescence images, directly applying the algorithm  
56 to grayscale image of DAPI fluorescence signal. The H&E images are converted to optical  
57 density (OD) using a logarithmic transformation before analysis.

58 **Section 2: A!HistoNotes**

59 AI-driven computational pathology diagnosis is an emerging but rapidly developing field. It  
60 uses computational algorithms to classify cancer and other diseases, based on the annotated  
61 images. Annotating pathological images requires experienced pathologists with years of  
62 training. A high-quality annotated image database is the basis for developing AI-based  
63 diagnostic solutions, because most successful models are derived from supervised learning. It  
64 is important to mark and annotate specific areas/structures/features to describe a disease at the  
65 cellular level, and then build and validate the models. Currently, there is no effective "medium"  
66 to transfer a pathologist's knowledge and experience to a machine. A!HistoNotes is a cloud-  
67 based structural annotation platform designed to enable pathologists to address this gap.

68

69 The image viewer (See Supplementary Figure 2A) based on the openseadragon software library  
70 can visualize DP images with high resolution of 40x objective lens, load image blocks quickly  
71 and smoothly, without consuming a lot of device memory and Internet data The most important  
72 basic event functions, such as "zoom", "pan" and "home page", can all be customized using its  
73 application programming interface (API) as illustrated in See Supplementary Figure 2B-C.

74

75 Annotation tool is one of the basic components of A!HistoNotes. The annotation tool provides  
76 a region of interest (ROI) management system and has the ability to create an adjustable ROI  
77 on top of the image viewer. In other words, when the entire image is moved by the user, the  
78 ROI adheres to a specific area on the image. Once the ROI shape is released, it can be fine-  
79 tuned. ROI management system refers to a way to easily manipulate and manage many ROIs  
80 on the viewer.

81

82 A!HistoNotes provides three ROI drawing methods for annotating task in the viewer, which  
83 can be found in the toolbox button as illustrated in Supplementary Figure 2D. They are the  
84 freehand drawing, polygonal-dot drawing and brush drawing shown in Supplementary Figure  
85 2E. When selecting ROI for further operation, user can click the right-click menu panel. They  
86 include labelling, copying, attribute updating and deleting operation. When user click "More  
87 label", ROI can be renamed (default label is "unknown"), and a tag window dialog box will  
88 appear for naming choices, as shown in Supplementary Figure 2F. Multiple ROI selection is  
89 one of the great features love to be used by our pathologist (See Supplementary Figure 2G).  
90 They first draw many ROIs and then label them at once, which is very helpful for them to save  
91 a lot of valuable annotation time.

92

93 When point the mouse at them, user can easily identify the ROI and related information on the  
94 ROI panel as demonstrated in Supplementary Figure 2H. In addition, selected ROI can be hided  
95 and showed easily by click on the "eye" icon at the ROI panel as shown in Supplementary  
96 Figure 2I. This is a particularly useful feature that allows pathologists to draw ROIs of tissues  
97 that may be obscured by another large ROI.

98

99 For AI-assisted diagnosis and semi-automatic annotation, the outputs generated the AI model  
100 can be converted into ROI in A!HistoNotes. Therefore, Pathologists can view and modify the  
101 ROI annotations using the A!HistoNotes image viewer, and fine-tune accordingly.

102

103 Besides, the time spent for annotation is an important measure to understand how easy it is for  
104 the pathologist to annotate the entire image slice. They are evidence showing the time spent by  
105 pathologists on fully manual annotations and time spent on some fine-tuning (semi-automatic  
106 annotations) of the ROI generated based on the AI model. Therefore, A!HistoNotes will

107 automatically record the time spent to draw in each ROI (See Supplementary Figure 2B) for  
108 performance evaluation.

### 109 **Section 3: Evaluation Metrics of AI model Performance on image dataset**

110 On the first level of evaluation, we measured AI model performance on prostatectomy and  
111 biopsy images. A standard set of metrics to evaluate the correspondence between model  
112 predictions and ground truth, which we defined as the pathologists' annotations for  
113 representative regions. For each annotated instance, its corresponding prediction is the  
114 dominant class (i.e., the most common predicted class) within the annotated region.

115

116 We evaluated prostatectomy samples and core needle biopsy samples differently according to  
117 the applications. For Gleason grading on prostatectomy specimens, sensitivity and F1 scores  
118 of each category, including GP3, GP4, GP5, and benign (stroma and normal) were calculated  
119 for multi-class comparison to quantify the performance. For tumor detection on core needle  
120 biopsy samples, we simplified the comparison by further grouping GP3, GP4, and GP5 as  
121 "malignant" segments. Sensitivity, specificity, positive predictive value (PPV), and negative  
122 predictive value (NPV) are used for binary comparison. Sensitivity, specificity, PPV, NPV and  
123 F1 Score are defined as:

$$124 \quad \text{Sensitivity (or recall)} = \frac{TP}{TP+FN} \quad (\text{Eq.1})$$

$$125 \quad \text{Specificity} = \frac{TN}{TN+FP} \quad (\text{Eq.2})$$

$$126 \quad \text{PPV (or precision)} = \frac{TP}{TP+FP} \quad (\text{Eq.3})$$

$$127 \quad \text{NPV} = \frac{TN}{TN+FN} \quad (\text{Eq.4})$$

$$128 \quad \text{F1 Score} = \frac{2 * \text{precision} * \text{recall}}{\text{precision} + \text{recall}} \quad (\text{Eq.5})$$

#### 129 **Section 4: Clinical Validation of AI-assisted diagnosis**

130 Although the AI model performs well on the image data set, further validation is required to  
131 examine whether it can assist pathologists in real-world application. In our study, the three-  
132 phase experiment aimed at comparing microscopic examination, WSI examination with and  
133 without AI assistance, in terms of accuracy, efficiency, and consistency of Gleason Grading.  
134 At each phase, pathologists examined 19 slides from testing set separately to determine the  
135 Gleason Score and the time they spent for each slide. The WSIs were scanned by Akoya  
136 Biosciences Vectra Polaris scanners at 20× magnification (0.5 μm/pixel). In phase 3, AI-  
137 assistance were provided, which includes, pseudo annotation, tumour percentage, Gleason  
138 Pattern percentage and Gleason Score, generated by the AI model.

139  
140 The diagnostic Gleason Score retrieved from hospital's database is considered as ground truth.  
141 It should be noted that this Gleason Score was calculated by summarizing multiple slides from  
142 a patient and might not reflect the actual Gleason Score of the selected slide used in our study.  
143 When calculating the accuracy and ICC, Gleason Score were converted to Gleason Grade  
144 Group, proposed by International Society of Urological Pathology in 2014, to simplify the  
145 analysis. Grade Group 1: Gleason Score  $\leq 6$ , Grade Group 2: Gleason Score 7(3+4), Grade  
146 Group 3: Gleason Score 7(4+3), Grade Group 4: Gleason Score 8, Grade Group 5: Gleason  
147 Score 9 or 10.

148  
149 Supplementary Figure 5 shows the details of each phase. Only three pathologists from  
150 Singapore participated in phase 1 as the glass slides can't be shipped to China. User guide and  
151 training were provided before the experiment to ensure that all the participants know how to  
152 use A!HistoNotes. There was a washout period of 20 days (at least) between each phase. In  
153 phase 2 and 3, the filename of the WSI were randomly generated, respectively.

154

## 155 **Section 5: Pathologist-AI Interaction via A!HistoNotes**

156 Initially, in the process of manual annotation, pathologists annotated the WSIs from scratch,  
157 and we used the annotated data to train multiple AI models and the optimal model is selected  
158 for further analysis. This model is called base model and it is the baseline for future  
159 development. We expect more data will be collected from hospitals to enlarge the annotation  
160 database and further improve the model, but manual annotation is time-consuming and tedious  
161 for pathologists. Furthermore, it is inefficient to retrain the model every time when new data is  
162 collected. Therefore, we designed Pathologist-AI interaction through semi-automatic  
163 annotations via A!HistoNotes and applying the concept of incremental learning to update the  
164 trained model.

165

166 Semi-automatic annotation was performed to manually correct pseudo annotations generated  
167 by the base model as not all of them are accurate. In this study, the base model was applied to  
168 39 slides randomly selected from the testing set to generate pseudo annotations while the rest  
169 of the 17 slides were still remain as testing images. Two pathologists from China and two from  
170 Singapore used A!HistoNotes to delete the pseudo annotations that they don't agree and applied  
171 the A!HistoNotes time-logging feature to automatically record the time they spent evaluating  
172 and correcting each image. We have recorded the time of semi-automatic annotation for 28  
173 slides, and the fully manual annotation time of 20 among these 28 slides were also recorded.

174

175 Finally, we applied these corrected annotations to further train and update the base model using  
176 Incremental learning approach, meaning that the model learned from the new data directly  
177 based on the based model. Specifically, we froze the top layer of the model and only updated

178 the weights of the bottom layer during training. After training, the base model and updated  
179 model were applied to the 17 test images, respectively, to compare their performances of  
180 distinguishing between malignant and benign tissues.

181

**Supplementary Table 1 Patient characteristic**  
(one patient's information is missing)

| <b>Age</b>           | <b>Number</b> | <b>Percentage</b> |
|----------------------|---------------|-------------------|
| 45-50                | 1             | 0.5%              |
| 51-60                | 23            | 10.7%             |
| 61-70                | 132           | 61.7%             |
| 71-80                | 49            | 22.9%             |
| 81-90                | 9             | 4.2%              |
| <b>Gleason Score</b> |               |                   |
| 3+3                  | 13            | 6.1%              |
| 3+4                  | 82            | 38.3%             |
| 4+3                  | 58            | 27.1%             |
| 4+4                  | 4             | 1.9%              |
| 3+5                  | 5             | 2.3%              |
| 5+3                  | 2             | 0.9%              |
| 4+5                  | 35            | 16.4%             |
| 5+4                  | 8             | 3.7%              |
| 5+5                  | 7             | 3.3%              |

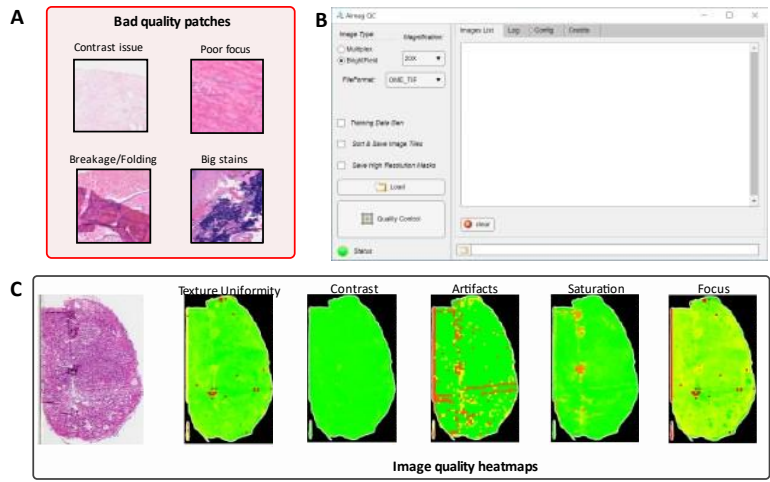

Supplementary Figure 1A|magQC

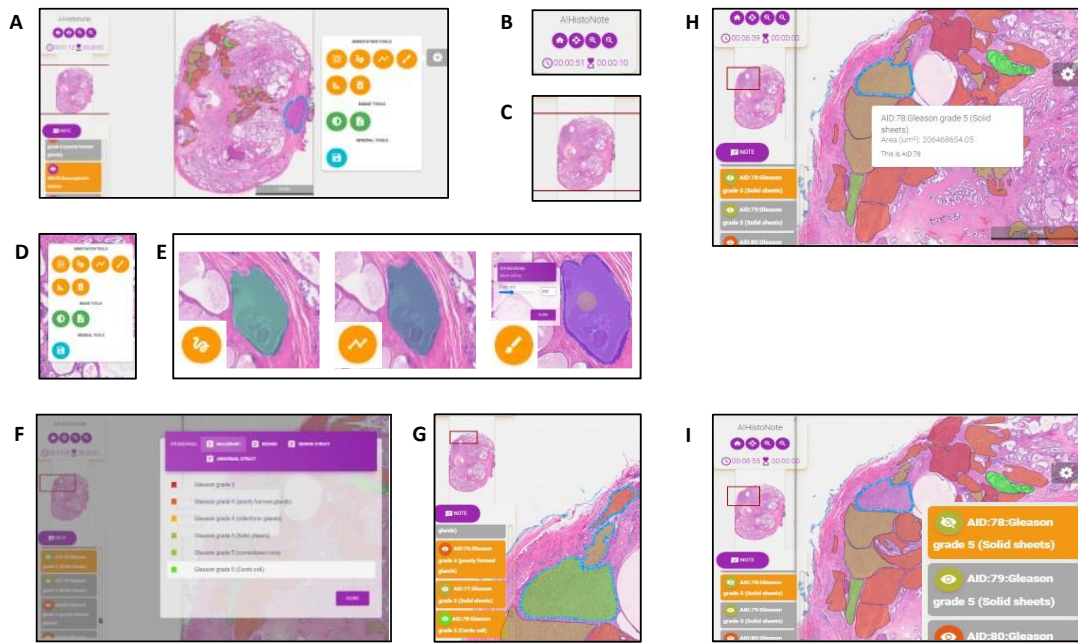

Supplementary Figure 2A!HistoNotes

## Supplementary Table 2 Pseudo code of train-test splitting

---

**Algorithm 1:** Stochastic Search for balanced dataset

---

**Data:**  
 $\mathcal{D} = \{(X_i, Y_i)\}_{i=1, \dots, 187} \leftarrow$  dataset with 187 images,  
 $X_i \leftarrow$  radical prostatectomy specimens image,  
 $Y_i \leftarrow$  collection of annotations on patch-level,  
 $C = \{G3, G4, G5, Stroma, Normal\} \leftarrow$  class label sets

**Output:**  
 $\mathcal{D}_{train} \leftarrow$  training dataset, 70% of  $\mathcal{D}$   
 $\mathcal{D}_{test} \leftarrow$  testing dataset, 30% of  $\mathcal{D}$

- 1  $FOUND = False$
- 2 **while** not  $FOUND$  **do**
- 3     **Step A:**
- 4     Random shuffle the  $\mathcal{D}$ , let
- 5      $\mathcal{D}_{train} \leftarrow \{(X_j, Y_j)\}_{j=1, \dots, 132}$
- 6      $\mathcal{D}_{test} \leftarrow \{(X_k, Y_k)\}_{k=133, \dots, 187}$
- 7     **Step B:**
- 8     Calculate the number of each class on patch-level in training dataset  
       and test dataset respectively. i.e.,
- 9      $N_{train}^{G3}, N_{train}^{G4}, N_{train}^{G5}, N_{train}^{Stroma}, N_{train}^{Normal}$
- 10     $N_{test}^{G3}, N_{test}^{G4}, N_{test}^{G5}, N_{test}^{Stroma}, N_{test}^{Normal}$
- 11    **Step C:**
- 12    // check the ratio ( $\mathcal{D}_{train}/\mathcal{D}$ ) is  $70\% \pm 5\%$
- 13    **for** class in  $C$  **do**
- 14         $Ratio^{class} = N_{train}^{class} / (N_{train}^{class} + N_{test}^{class})$
- 15        **if**  $65\% \leq Ratio^{class} \leq 75\%$  **then**
- 16            |  $FOUND = True$
- 17        **else**
- 18            |  $FOUND = False$
- 19            | Break
- 20    **end**

---

### Supplementary Table 3 Pseudo code of Voting algorithm

---

**Algorithm 1:** Voting algorithm for each overlapped patch

---

**Input:**  $\mathcal{D} = \{(C_i, S_i)_{i=1, \dots, 4} : C_i \in \{G3, G4, G5, Stroma, Normal\}, S_i \in (0, 1)\}$ , a collection of label  $C_i$  and score  $S_i$  for each overlapping patch.

**Output:** The label  $C$  and score  $S$  for each overlapped patch.

```
1 if  $|Set\{C_1, C_2, C_3, C_4\}| = 4$  then
2   |   Class:  $C = \underset{C}{\operatorname{argmax}} \{S_i : (C_i, S_i) \in \mathcal{D}\}$ 
3   |   Score:  $S = S_i$ 
4 else if most frequent class  $C \in \mathcal{D}$  then
5   |   Class:  $C = C$ 
6   |   Score:  $S = \operatorname{mean}(S | \text{most frequent } C)$ 
7 else
8   |   Class:  $C = \underset{C}{\operatorname{argmax}} \mathbb{E}_{S \in \mathcal{D}}(S | C_i)$ 
9   |   Score:  $S = \operatorname{mean}(S | C)$ 
```

---

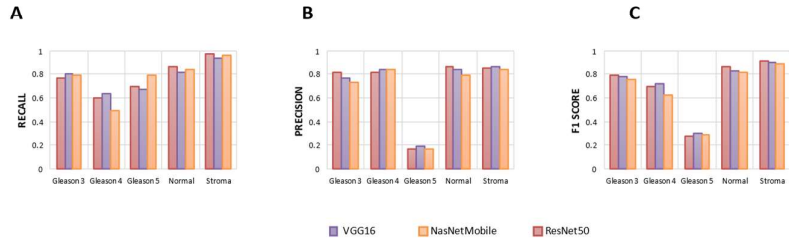

Supplementary Figure 3 Model performance on image patch level (test set)

**Supplementary Table 4 Configuration of color augmentation** All values are subject to 5% variance. R, G, B values are first adjusted by addition/subtraction, then rescaled to [0 1], followed by clipping, in which values below `low_in` are mapped to 0 and values above `high_in` map to 1. `Low_in` and `High_in` values apply to all R, G, B channels

| Configuration | R value | G value | B value | Low_in | High_in |
|---------------|---------|---------|---------|--------|---------|
| 1             | -60     | -50     | -20     | 0.05   | 0.95    |
| 2             | -30     | -45     | -60     | 0.05   | 0.95    |
| 3             | +35     | +70     | +35     | 0.1    | 0.9     |

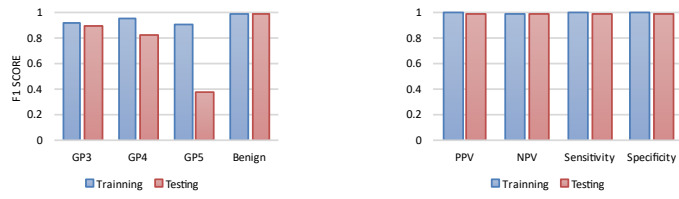

Supplementary Figure 4 Model performance (high resolution model) on training (131 WSIs) and testing set (56 WSIs).

|        | Hardware                                                                                                        | Software     | Samples                                                                                                                                       | Participants                                                                                           |
|--------|-----------------------------------------------------------------------------------------------------------------|--------------|-----------------------------------------------------------------------------------------------------------------------------------------------|--------------------------------------------------------------------------------------------------------|
| Step 1 | routinely used microscopes<br> | NA           | 19 glass slides<br>                                          | Dr Hue Swee Shan Susan<br>Dr Lau Kah Weng<br>Dr Tan Char Loo                                           |
| Step 2 | Computers<br>                  | AIHistoNotes | 19 digital slides<br>                                        | Dr Hue Swee Shan Susan<br>Dr Lau Kah Weng<br>Dr Tan Char Loo<br>Dr Chongchong Zhang<br>Dr Yonghu Zhang |
| Step 3 | Computers<br>                  | AIHistoNotes | 19 digital slides each comes with predicted annotations<br> | Dr Hue Swee Shan Susan<br>Dr Lau Kah Weng<br>Dr Tan Char Loo<br>Dr Chongchong Zhang<br>Dr Yonghu Zhang |

Supplementary Figure 5 Setup of the 3-phase study

# A!magQC

Digital Histopathology Images Quality Control.

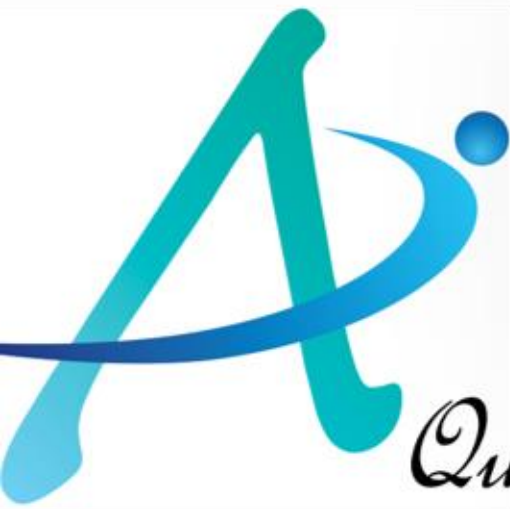

*Quality Control*

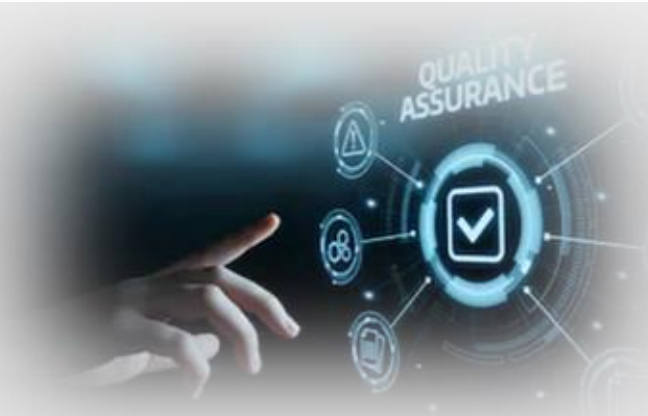

Version 4.1.

- I. Quick Start
- II. Outputs

# Quick Start

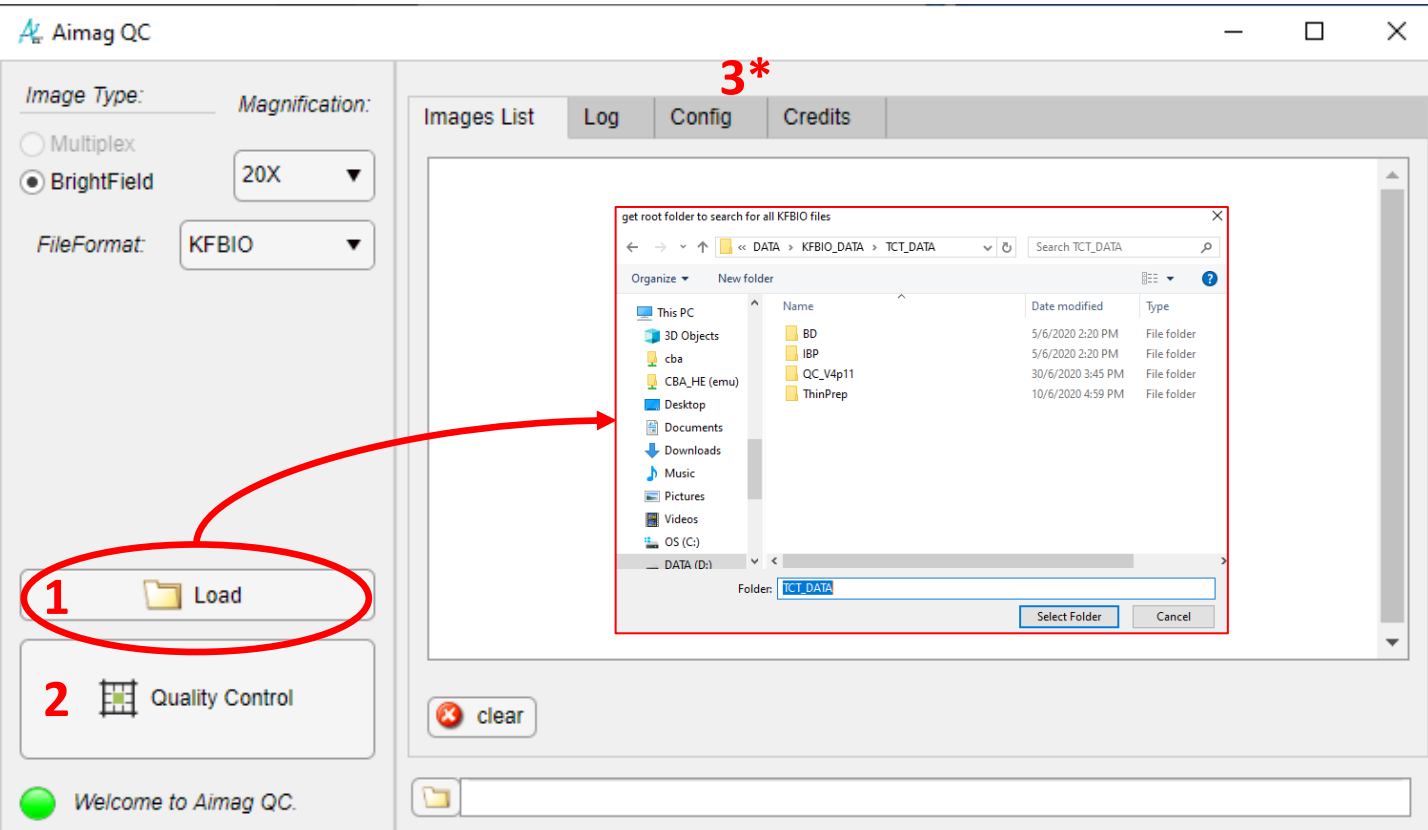

1. Press Load and Select a Root Folder Containing a List of Images or a List of Subfolders with Images. ( Detects all “.kfb” files in folder and subfolders.)
2. Press Quality Control button to Start the Quality Assessment of all Files in Images List Listbox.
3. Select BrightField or TCT

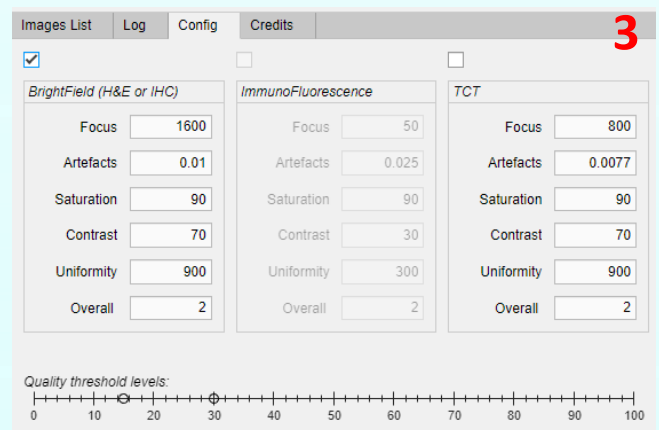

# Outputs

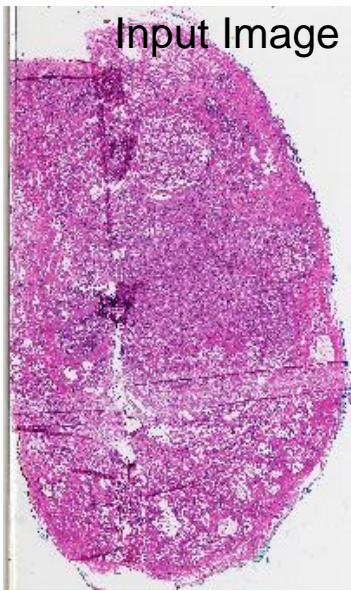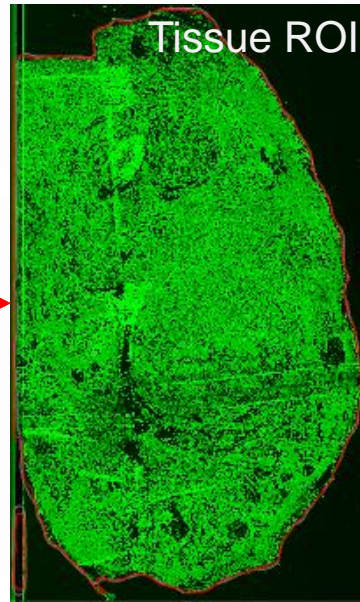

## Quality Heat maps

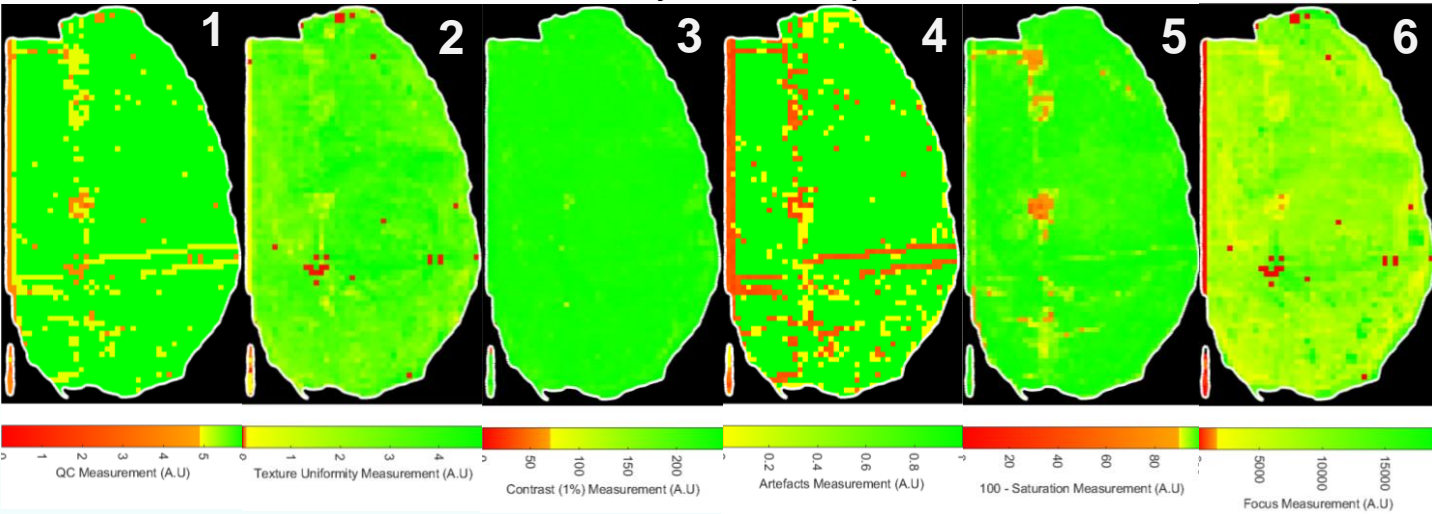

Visual representation of the Quality Assessment of the image Texture , Contrast, Artefacts, Saturation and Focus (2-6).

The QC measurement (1) is a linear combination of the 5 aforementioned image properties.

# Output

## Summary of quality measurements

|    | A                                    | B                        | C           | D                   | E             | F             | G                | H              | I                   | J                      | K              | L               | M               | N          |       |
|----|--------------------------------------|--------------------------|-------------|---------------------|---------------|---------------|------------------|----------------|---------------------|------------------------|----------------|-----------------|-----------------|------------|-------|
| 1  | Image_Name                           | Image_Root               | Image_Type  | Image_Magnification | Low_Focus_Pct | Artifacts_Pct | Low_Contrast_Pct | Saturation_Pct | High_Uniformity_Pct | Global_Low_Quality_Pct | Focus_Area_Pct | Tissue_Area_Pct | Number_of_Tiles | Status     |       |
| 2  | 26216_17_A15                         |                          | 10/12020    | BrightField         | 20X           |               |                  |                |                     |                        |                |                 |                 |            |       |
| 3  | 78822020-01-02_15_55_14              |                          | 2/12020     | BrightField         | 20X           | 7.137817123   | 4.827637317      | 1.402305558    | 0.893812667         | 6.495509844            | 7.915372862    | 93.70482242     | 77.86734375     | 3722.34922 | Valid |
| 4  | 81642020-01-02_15_51_19              |                          | 2/12020     | BrightField         | 20X           | 3.347236323   | 10.64727702      | 1.541237303    | 10.50803594         | 2.983021885            | 6.987682592    | 100.4039872     | 75.3897336      | 3213.21836 | Valid |
| 5  | 894_16_A20_correo2020-01-10_13_45_03 |                          | 10/12020    | BrightField         | 20X           | 4.076844568   | 12.89785808      | 0.828570829    | 3.821191648         | 2.253695413            | 6.117862333    | 93.33383105     | 74.03908235     | 2842.15292 | Valid |
| 6  | 994_16_A20_correo2020-01-10_13_45_03 |                          | 10/12020    | BrightField         | 20X           | 3.354540448   | 12.25763029      | 0.127684641    | 2.708879368         | 1.387794287            | 4.582686431    | 100.0592014     | 75.5146983      | 2770.42717 | Valid |
| 6  | AL_1_2020-02-18_11_09_26             | SBIC_HE_20X_20200218_KFB | BrightField | 20X                 | 0             | 3.058589505   | 0.122626122      | 81.71567196    | 0.349619844         | 0.122626122            | 102.105202     | 13.686395055    | 121.05088       | Valid      |       |
| 7  | AL_2_2020-02-18_11_09_31             | SBIC_HE_20X_20200218_KFB | BrightField | 20X                 | 0             | 4.32496957    | 0                | 92.24708535    | 0                   | 1.624539225            | 102.1325614    | 35.53907219     | 293.24488       | Valid      |       |
| 8  | AL_3_2020-02-18_11_07_24             | SBIC_HE_20X_20200218_KFB | BrightField | 20X                 | 0             | 3.941122176   | 0.038573298      | 85.53027303    | 0.171681313         | 1.6448225              | 102.6873719    | 30.23832759     | 277.68893       | Valid      |       |
| 9  | AL_4_2020-02-18_11_06_40             | SBIC_HE_20X_20200218_KFB | BrightField | 20X                 | 1.080984126   | 3.97349304    | 0                | 99.83334743    | 0.044760057         | 5.028041106            | 100.3271906    | 47.11655792     | 250.49119       | Valid      |       |
| 10 | BL_1_2020-02-18_11_05_53             | SBIC_HE_20X_20200218_KFB | BrightField | 20X                 | 0             | 0             | 0                | 0.707320946    | 0                   | 0                      | 101.1603837    | 32.16685268     | 218.64332       | Valid      |       |
| 11 | BL_2_2020-02-18_11_18_51             | SBIC_HE_20X_20200218_KFB | BrightField | 20X                 | 0             | 4.745082907   | 0                | 48.85638661    | 0.403418397         | 3.767204013            | 104.5520194    | 14.91930084     | 125.99822       | Valid      |       |
| 12 | BL_3_2020-02-18_11_18_03             | SBIC_HE_20X_20200218_KFB | BrightField | 20X                 | 0             | 14.24845758   | 0.089016437      | 60.20747649    | 0.547713779         | 2.540198988            | 108.3279408    | 18.93868046     | 134.1887        | Valid      |       |
| 13 | BL_4_2020-02-18_11_16_56             | SBIC_HE_20X_20200218_KFB | BrightField | 20X                 | 9.079850302   | 4.486184913   | 0                | 22.46896846    | 0.150135377         | 2.401534281            | 103.7865171    | 21.77007568     | 243.11392       | Valid      |       |
| 14 | demo1                                | KFB_FORMAT_TEST          | BrightField | 40X                 | 1.803193221   | 0.486162889   | 0.162054296      | 33.11422512    | 1.803193221         | 2.127307813            | 105.2191979    | 72.28625        | 617.07713       | Valid      |       |
| 15 | demo2                                | KFB_FORMAT_TEST          | BrightField | 40X                 | 6.887583851   | 0.285193901   | 0.598178652      | 25.23695656    | 6.887583851         | 6.887583851            | 101.9538917    | 71.97334835     | 701.27727       | Valid      |       |
| 16 | demo3                                | KFB_FORMAT_TEST          | BrightField | 40X                 | 1.21844475    | 0             | 3.977198195      | 0              | 1.23539737          | 1.23539737             | 106.3264368    | 71.19486325     | 494.937677      | Valid      |       |

| Low_Focus Pct | Artifacts Pct | LowContrast Pct | Saturatio Pct | High Uniformity Pct | Global Low Quality Pct | Tissue_Area Pct | Number of Tiles | Status |
|---------------|---------------|-----------------|---------------|---------------------|------------------------|-----------------|-----------------|--------|
| 3.35          | 12.25         | 0.12            | 2.70          | 1.38                | 4.58                   | 75.51           | 2770.42         | Valid  |

Percentage of "Tiles" ( 256\*256 contiguous blocks of the Tissue Region of Interest) Below Quality Threshold.

- Low Focus : % of tiles with a low focus
- Artifacts : % of tiles with Artefacts ( dust , folding, cluster, ...)
- Low Contrast : % of tiles with a low contrast ( faded staining, empty regions, ...)
- Saturation : % of tiles with saturated colors ( strong stain, clusters, ...)
- Uniformity : % of tiles with a smooth Texture ( faded stain, slight out of focus, ...)
- Global Low quality : Linear combination of 5 aforementioned measurements.
- Tissue Area : % of Image Area that contains Tissue.
- Number of Tiles : Weighted Number of Tiles with in Tissue Area. ( Tiles on Tissue edges have less weights since cropped by Tissue Region boundary.)
- Status : Aimag QC estimated image Quality:
  - *Valid*: image can be used for diagnosis/ further processing
  - *To Check*: image may be used for diagnosis if reviewed by specialist
  - *Rejected*: image quality is too low for diagnosis/ further processing

# A!HISTONOTE VERSION 2.0

Perfect tools for pathologists  
Diagnosing & Prognosing Your Patient Can  
Be Faster, Which Was Previously  
Impossible.

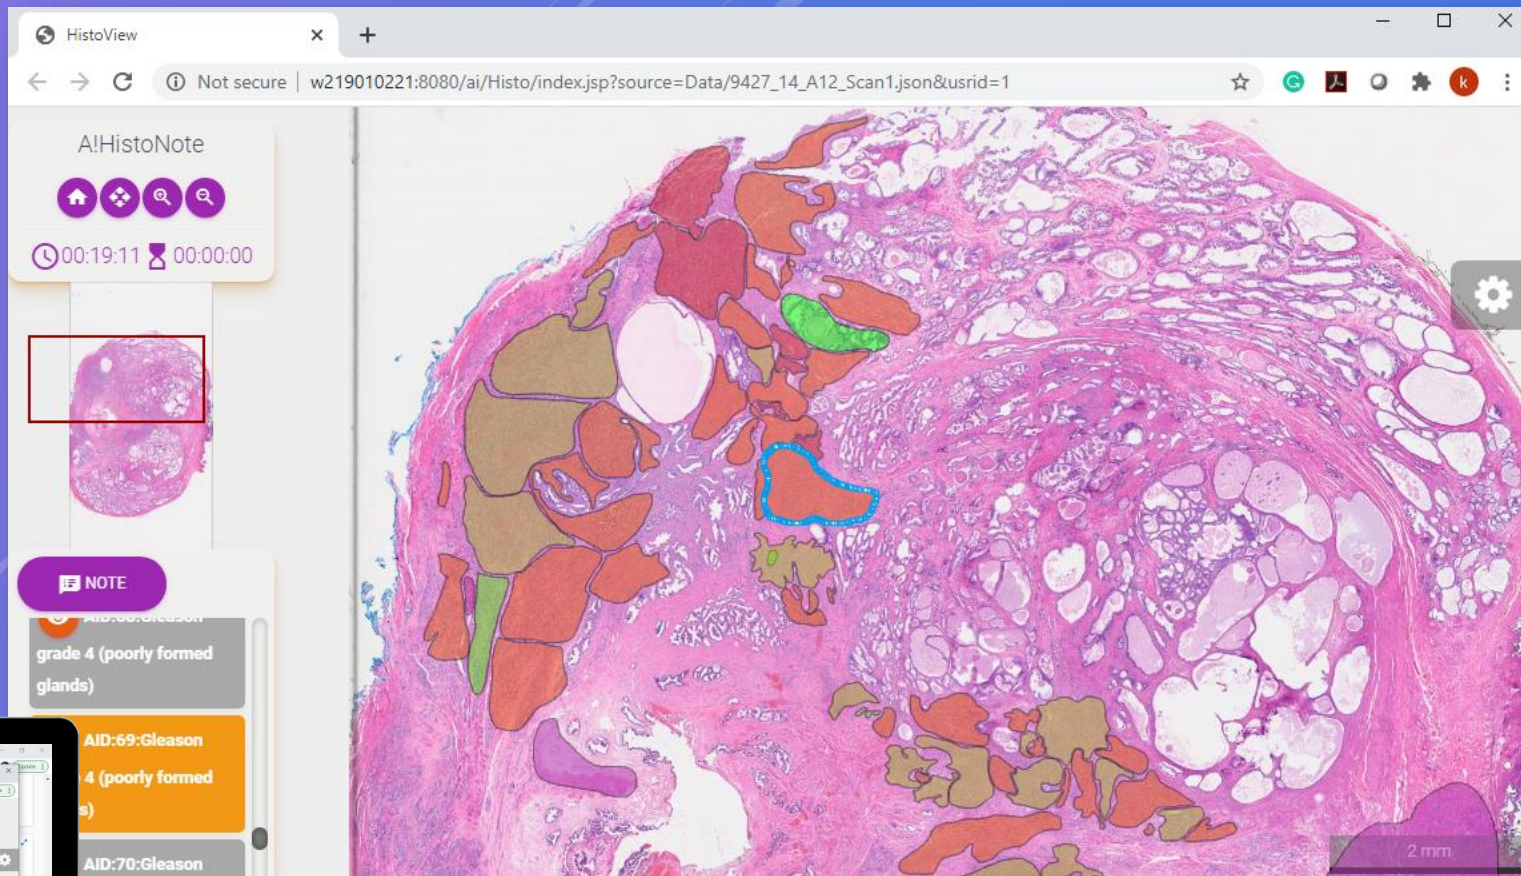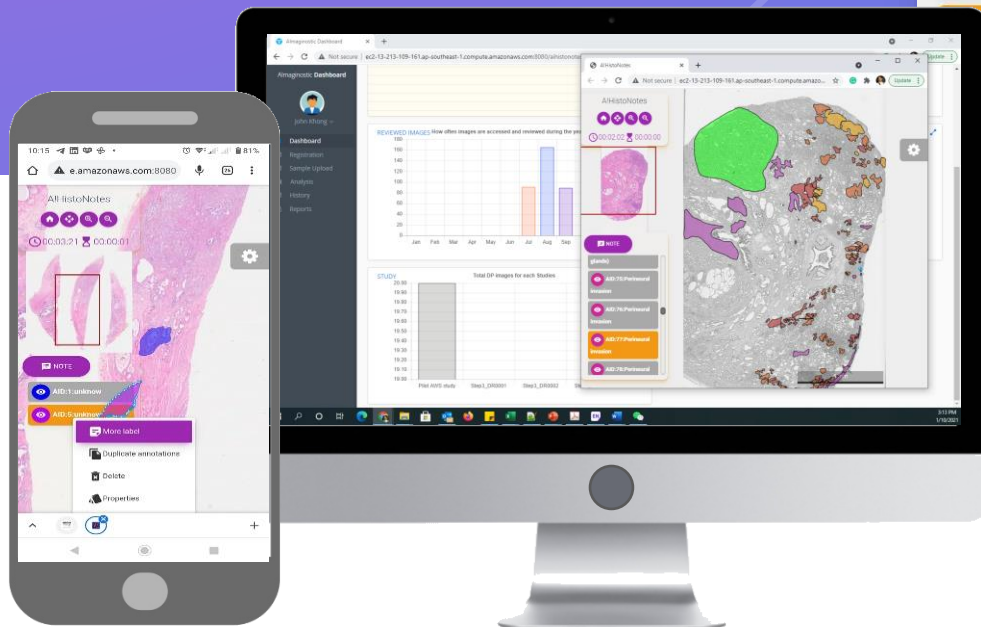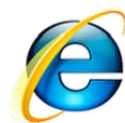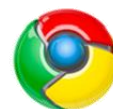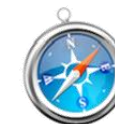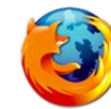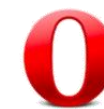

Supported Browsers

# About A!HistoNote

View proprietary bright field and fluorescence virtual slide formats, annotations, and analysis results directly in **ANY** browser from **ALL** your devices (desktops, laptops, tablets, and mobile phones).

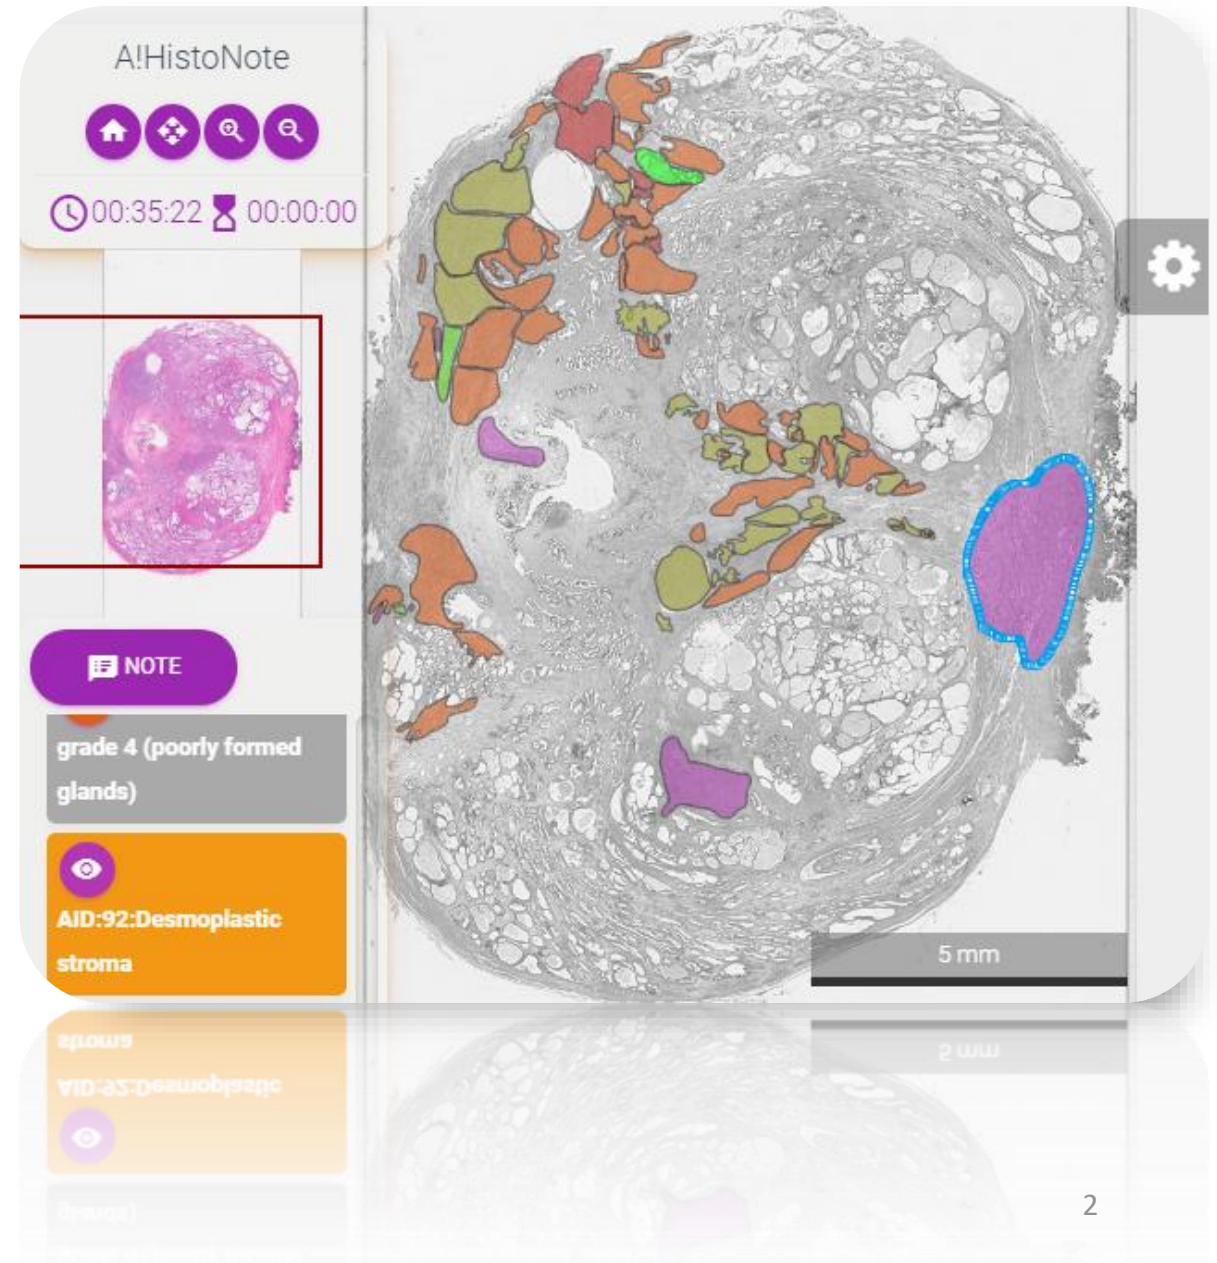

# A!HistoNote Homepage

## Dashboard

1. Title of dashboard
2. View notifications
3. Edit title of dashboard
4. Create comments and reminders for analyses
5. Bar chart to show how often images are accessed and reviewed during a calendar year
6. Total Digital Pathologic (DP) images for each project
7. Total DP images for each study

1
Dashboard of Institute of Molecular and Cell Biology (IMCB,SG)

2
3

---

4

**NOTES**

Remember to:

- Zoom in and out in the pyramid view
- Filter the image noise and drag a set of them to the Reports tab
- Create a new report
- Change the schedule of the image upload process

5

**VIEWED IMAGES**

How often images are accessed and reviewed during the year 2021

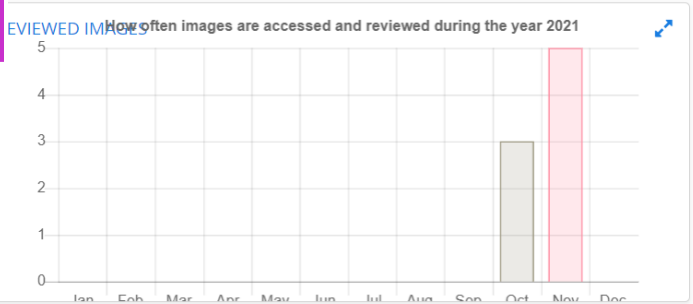

| Month | Count |
|-------|-------|
| Jan   | 0     |
| Feb   | 0     |
| Mar   | 0     |
| Apr   | 0     |
| May   | 0     |
| Jun   | 0     |
| Jul   | 0     |
| Aug   | 0     |
| Sep   | 0     |
| Oct   | 3     |
| Nov   | 5     |
| Dec   | 0     |

---

6

**PROJECT**

Total DP Images for each Projects



Legend: AWS Pilot Project

7

**STUDY**

Total DP images for each Studies



| Study           | Total DP Images |
|-----------------|-----------------|
| Pilot AWS study | 20              |
| Step3_DP0002    | 29              |
| Step3_DP0003    | 28              |
| Step3_DP0001    | 20              |

3

# A!HistoNote Homepage

## Analysis

1. View list of studies
2. Select study
3. List of slide/image samples in selected study
4. Create or modify annotations on selected slide/image sample

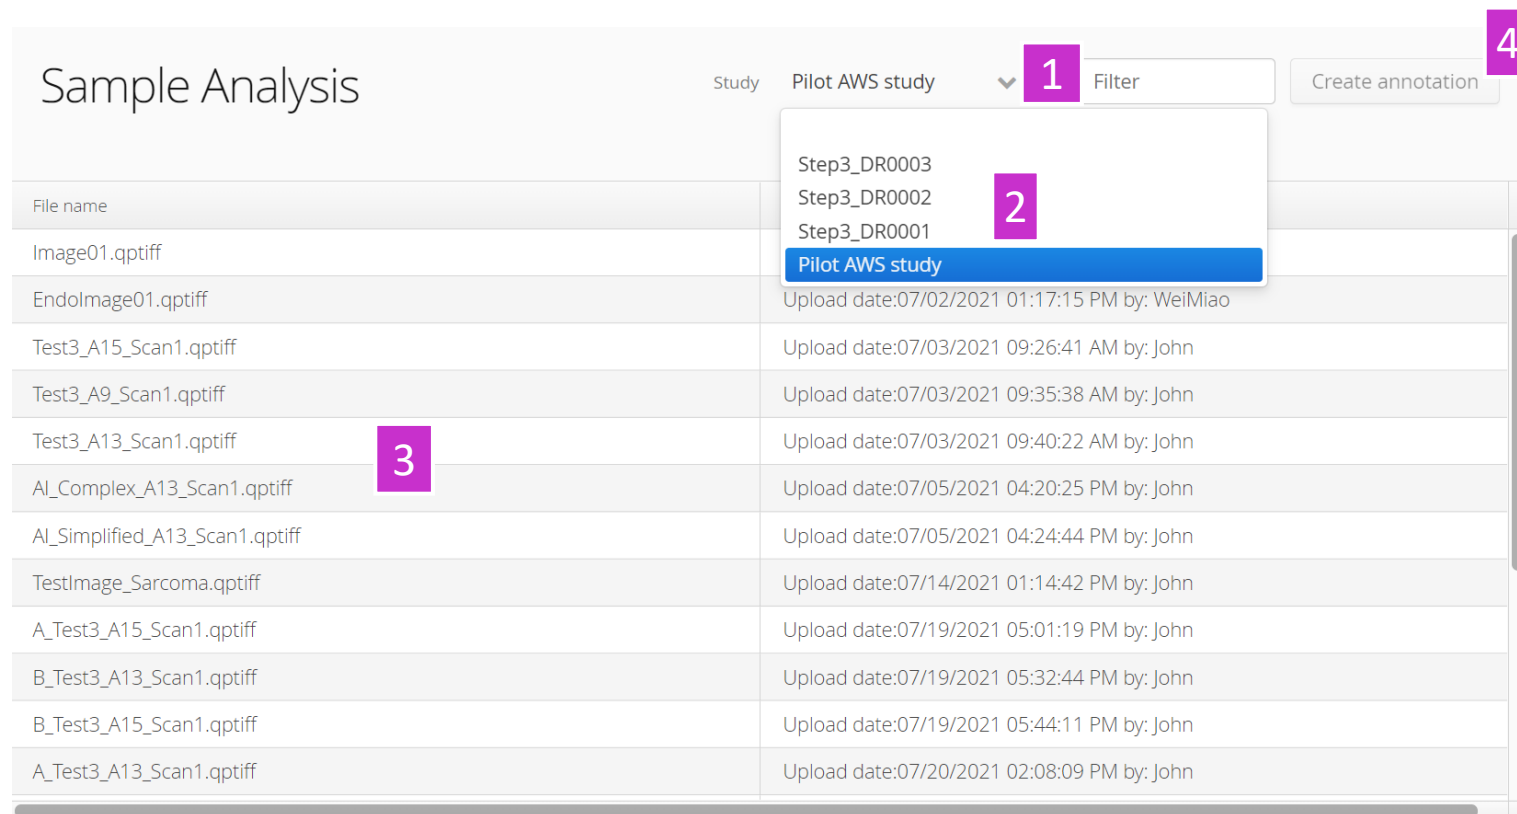

Sample Analysis

Study: Pilot AWS study 1 Filter 4 Create annotation

| File name                             |                                                |
|---------------------------------------|------------------------------------------------|
| Image01.qptiff                        |                                                |
| EndoImage01.qptiff                    | Upload date:07/02/2021 01:17:15 PM by: WeiMiao |
| Test3_A15_Scan1.qptiff                | Upload date:07/03/2021 09:26:41 AM by: John    |
| Test3_A9_Scan1.qptiff                 | Upload date:07/03/2021 09:35:38 AM by: John    |
| Test3_A13_Scan1.qptiff <span>3</span> | Upload date:07/03/2021 09:40:22 AM by: John    |
| AI_Complex_A13_Scan1.qptiff           | Upload date:07/05/2021 04:20:25 PM by: John    |
| AI_Simplified_A13_Scan1.qptiff        | Upload date:07/05/2021 04:24:44 PM by: John    |
| TestImage_Sarcoma.qptiff              | Upload date:07/14/2021 01:14:42 PM by: John    |
| A_Test3_A15_Scan1.qptiff              | Upload date:07/19/2021 05:01:19 PM by: John    |
| B_Test3_A13_Scan1.qptiff              | Upload date:07/19/2021 05:32:44 PM by: John    |
| B_Test3_A15_Scan1.qptiff              | Upload date:07/19/2021 05:44:11 PM by: John    |
| A_Test3_A13_Scan1.qptiff              | Upload date:07/20/2021 02:08:09 PM by: John    |

Dropdown menu (2):

- Step3\_DR0003
- Step3\_DR0002
- Step3\_DR0001
- Pilot AWS study**

# A!HistoNote Version 2.0

## Overview

1. Panel
2. Dropdown menu
3. Region of Interest (ROI) tools
4. Workspace

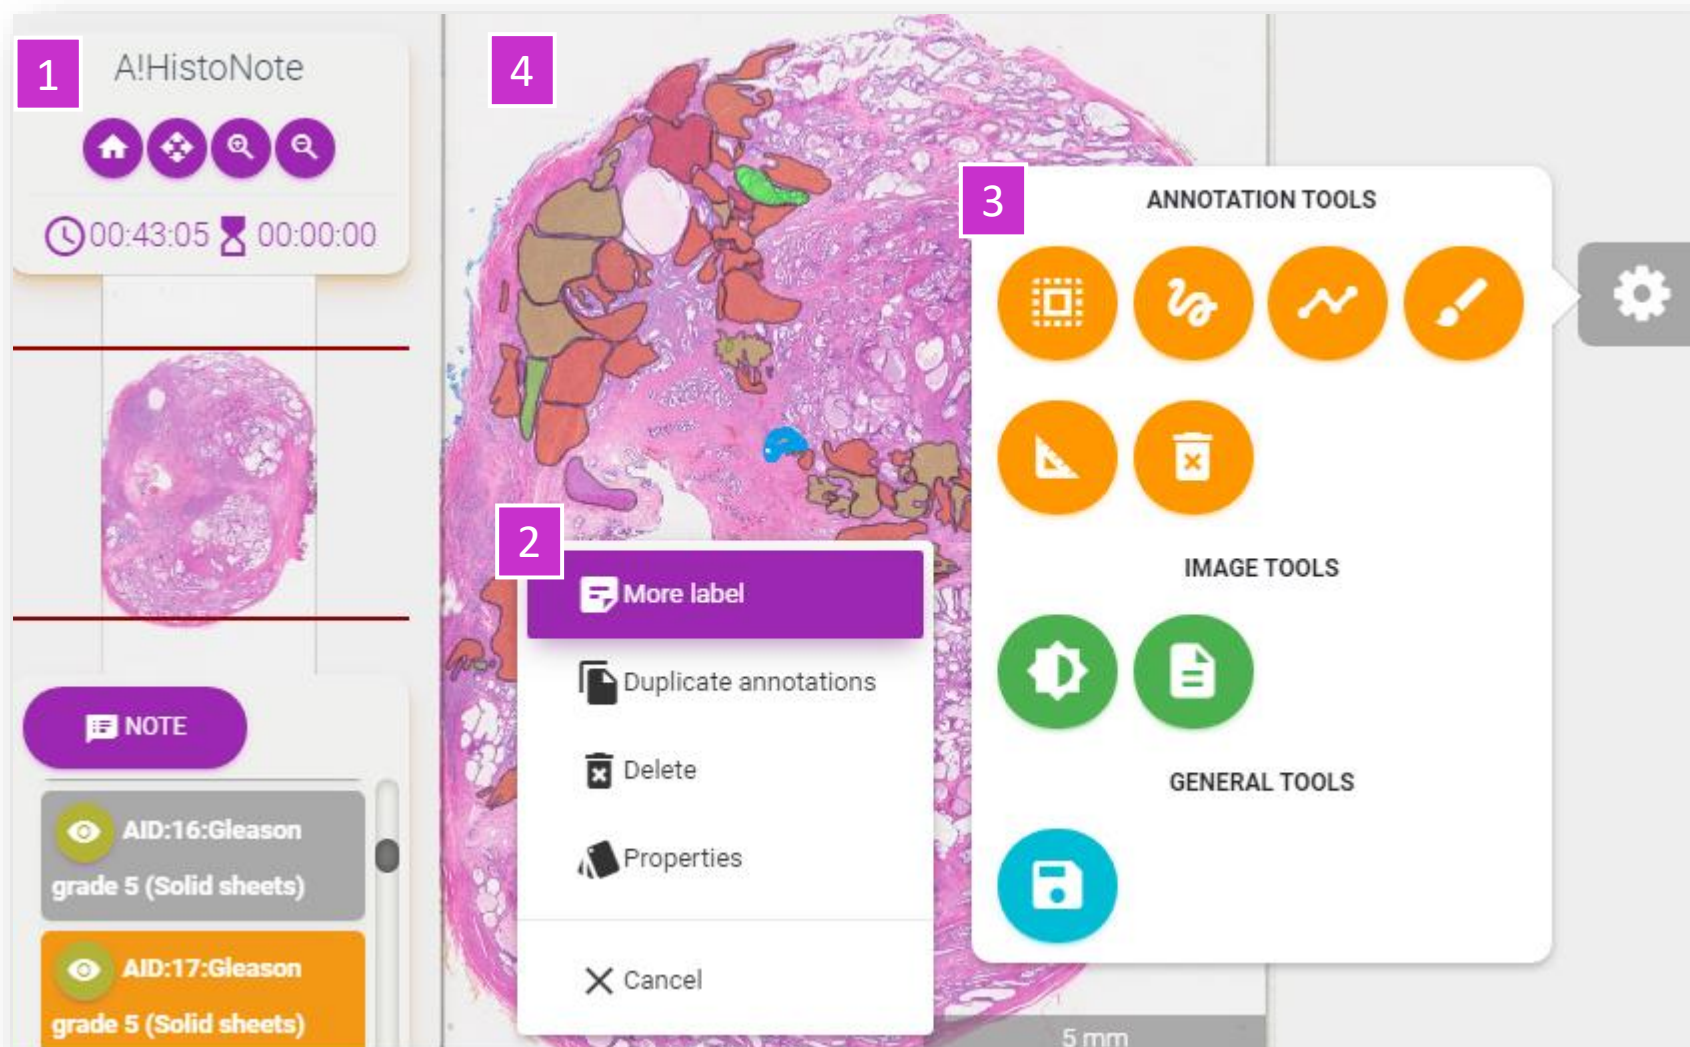

# 1 A!HistoNote Panel

## Image Navigation Panel

1. Reset image to 1:1 ratio
2. Move image position
3. Zoom in
4. Zoom out

## Stopwatch Panel

5. Time spent viewing each image
6. Time recorder for each ROI

## Viewport Navigator Panel

7. Display the source image as a reference, and the highlighted area shows the part of the image the user is currently viewing on the workspace.

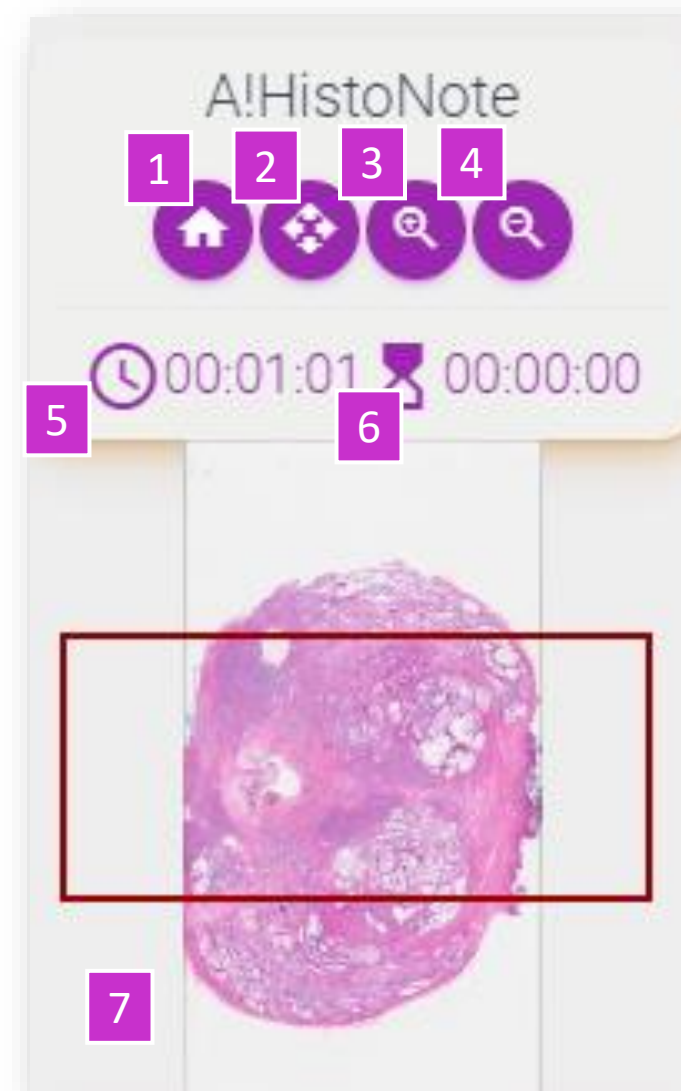

# 1 A!HistoNote Panel

## Annotation Label Management Panel

1. Toggle button to show or close the panel
2. Toggle buttons to show or close the annotation ROI
3. Label of the created annotation ROI

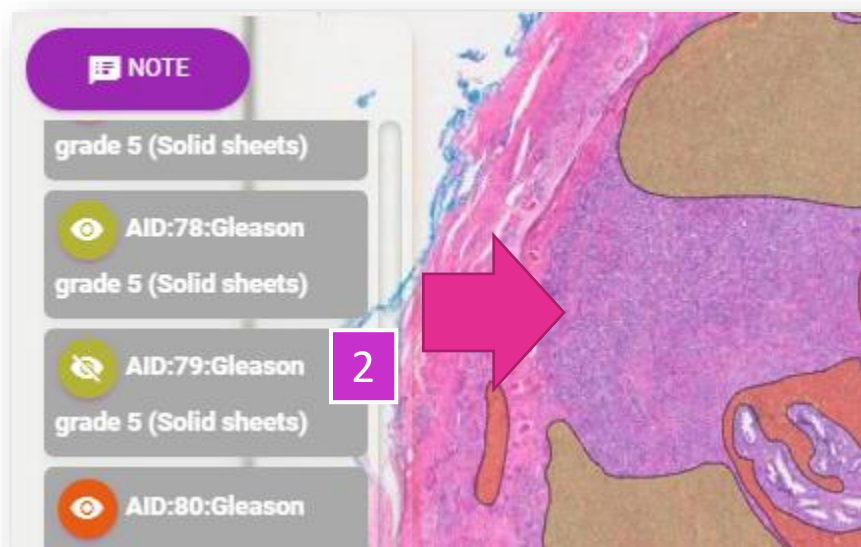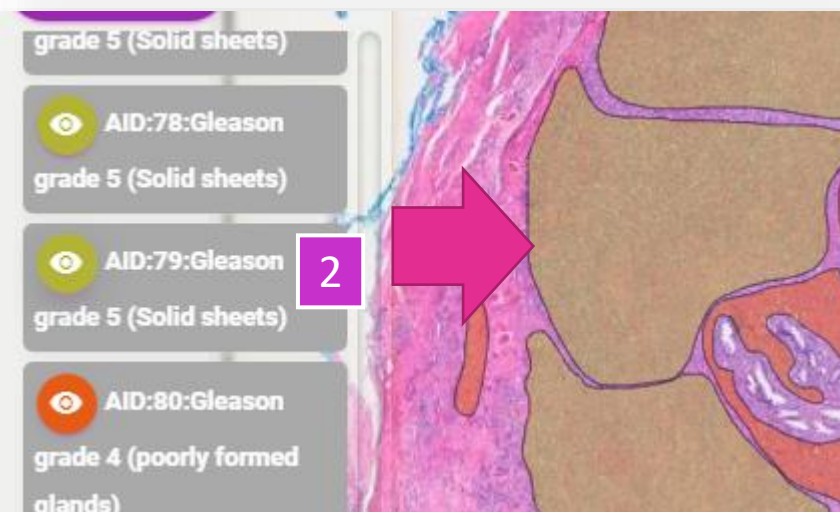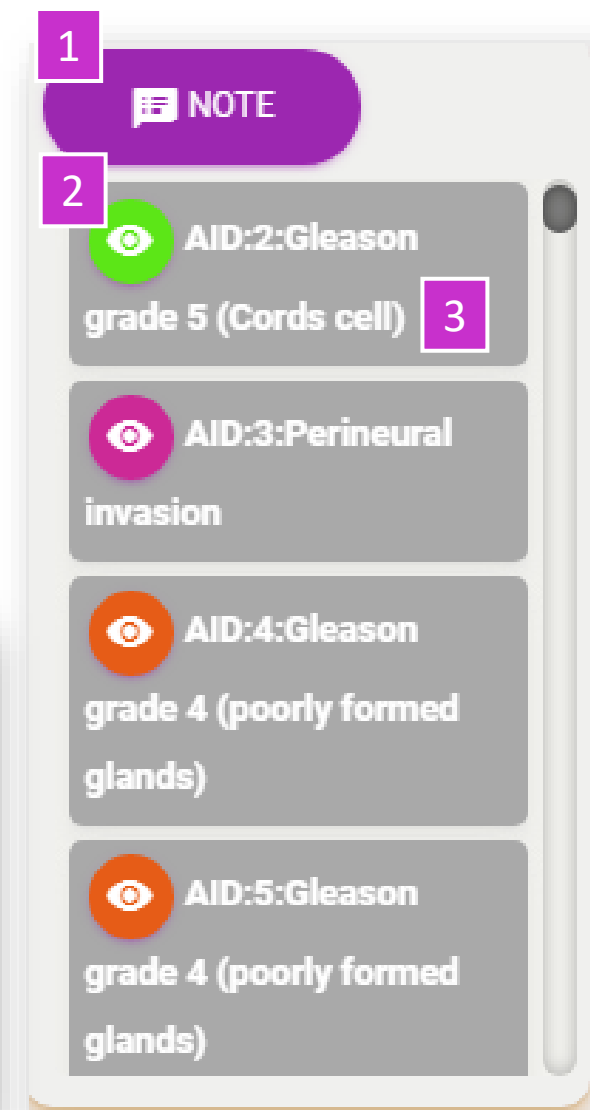

# 1 A!HistoNote Panel

## Annotation Label Management Panel

1. Automatic label highlight and detection when ROI is selected
2. Pathologist's annotated ROI and detailed information of the annotation will be displayed on the region-tip

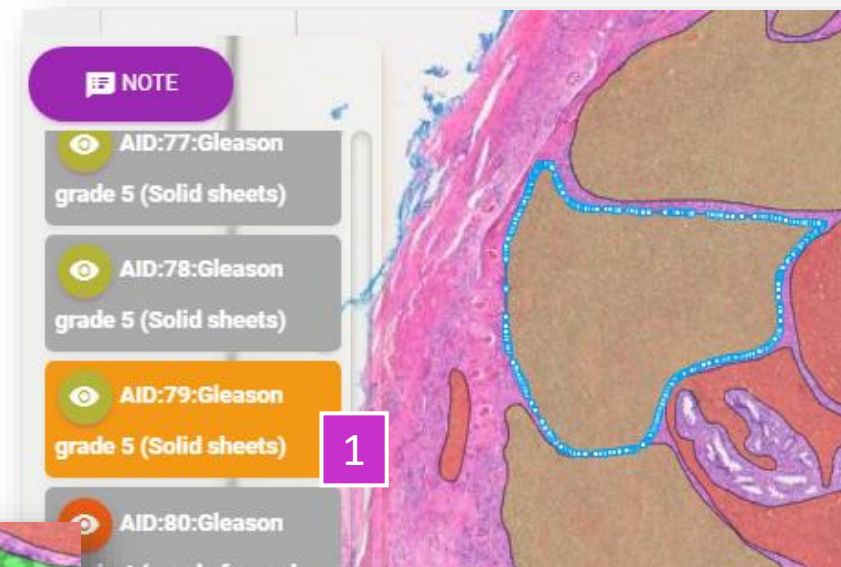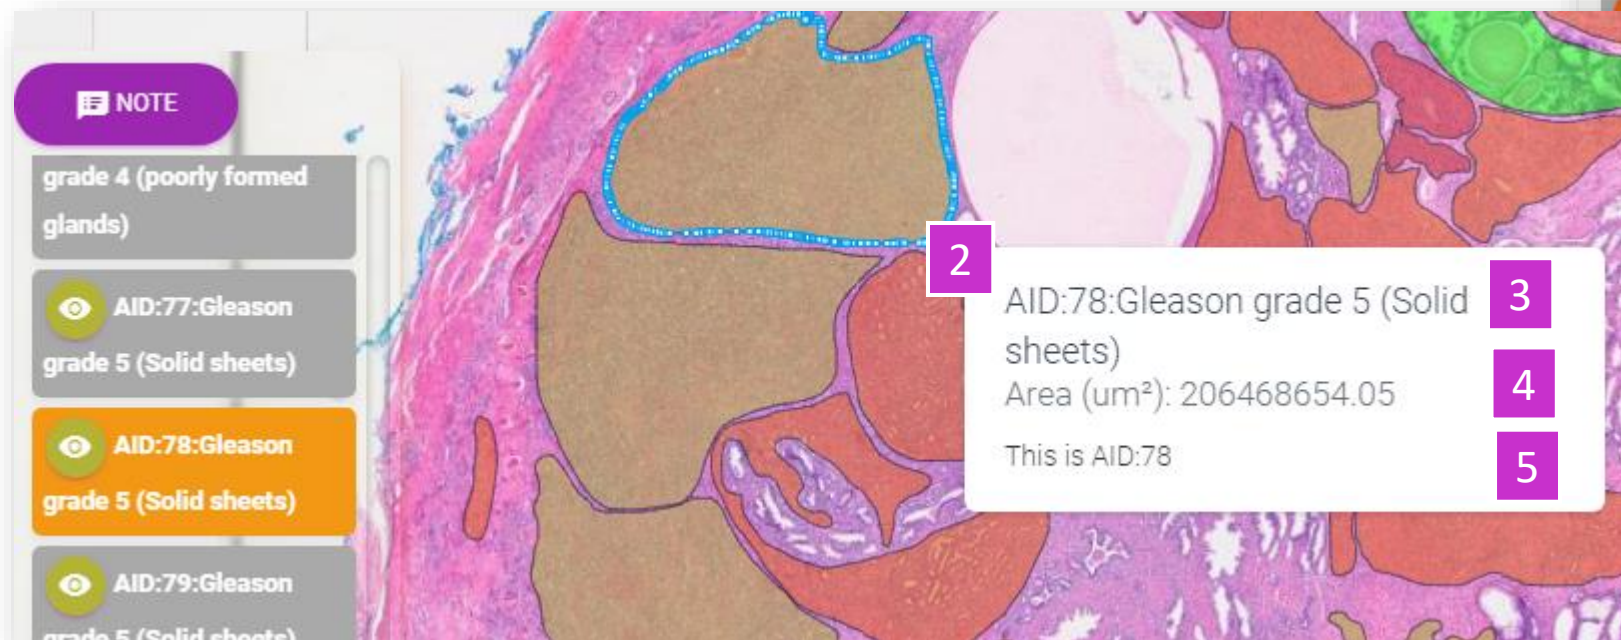

## Region-tip

3. Tag ID: Area label
4. Area in um<sup>2</sup>
5. Regional notes

# 1 A!HistoNote Panel

## Annotation Label Management Panel

1. Multiple ROIs can be selected to perform operations in the drop-down menu.
2. Actions available in dropdown menu

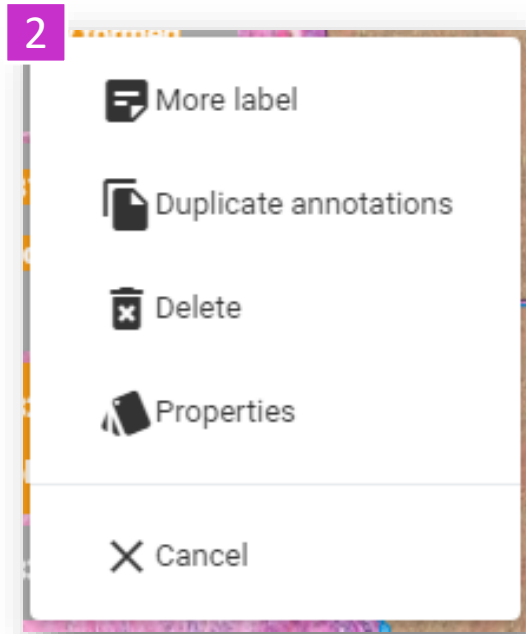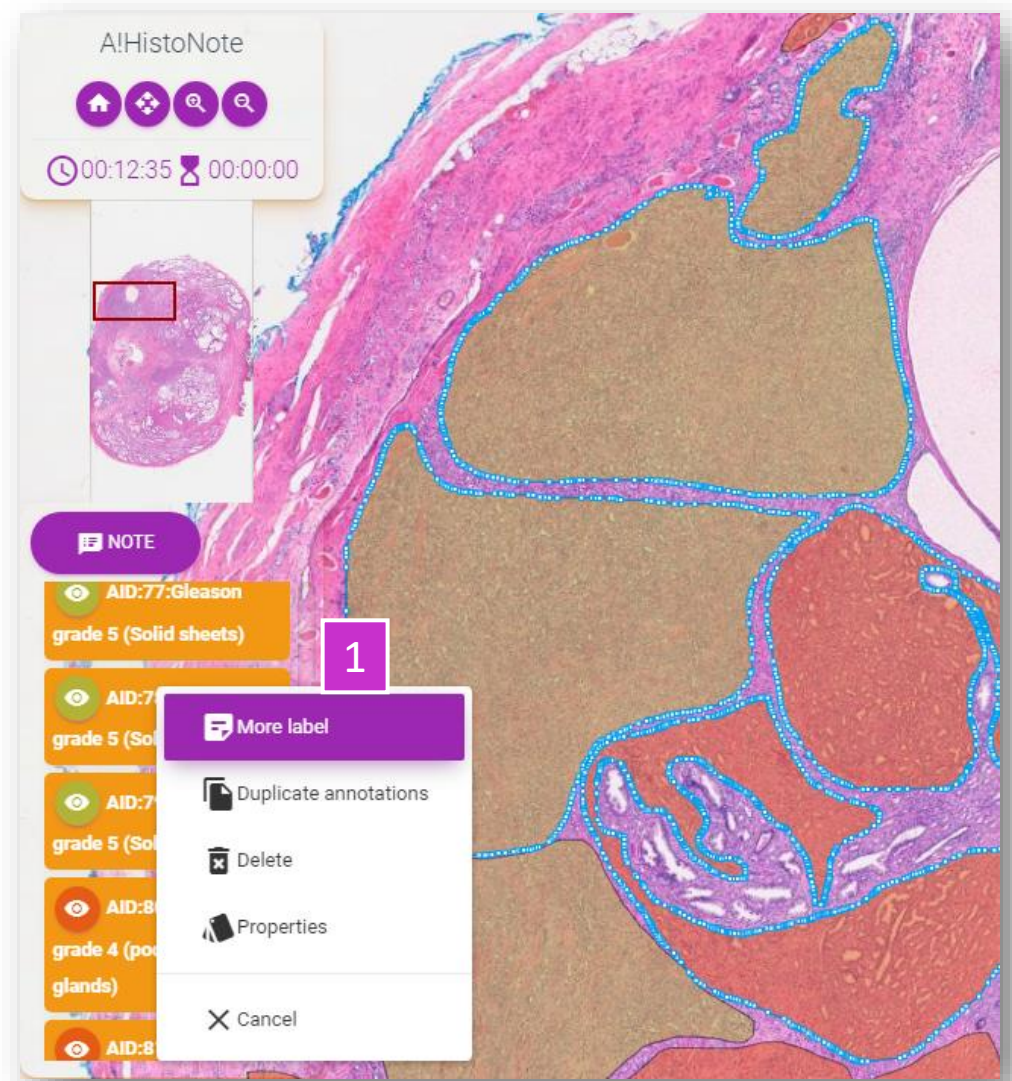

# 2 A!HistoNote Dropdown menu

## Panels to access Label and ROI dropdown menu

Access by right clicking the mouse

1. Annotation Label Management Panel
2. Annotation ROI Drawing Area

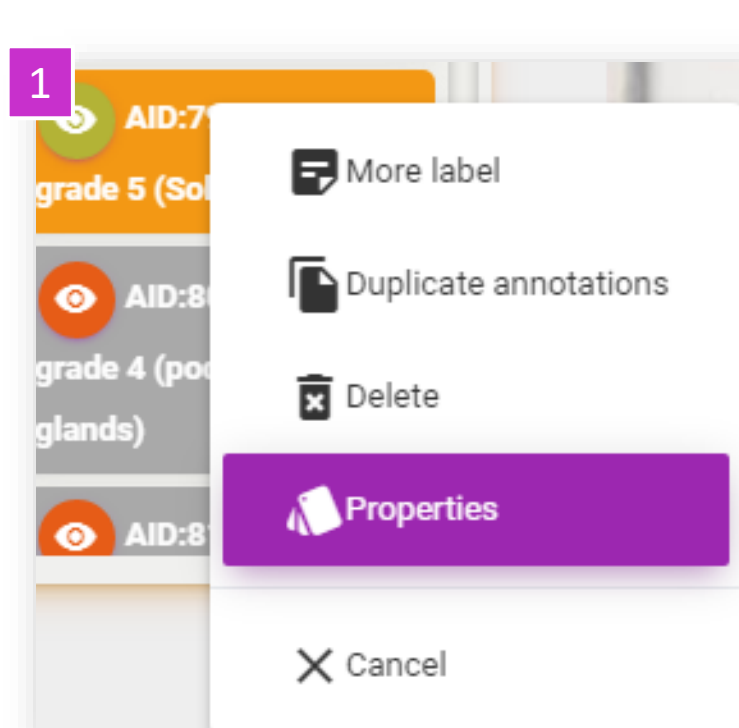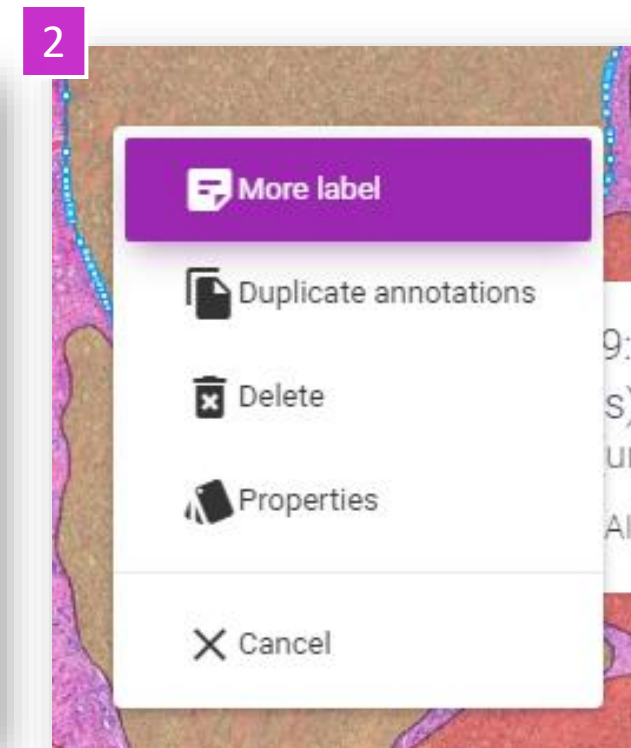

# 2 AIHistoNote Dropdown menu

## [More Label] in the Dropdown Menu

1. Category of tissue cell type
2. Click the label of tissue cell type to assign to the ROI

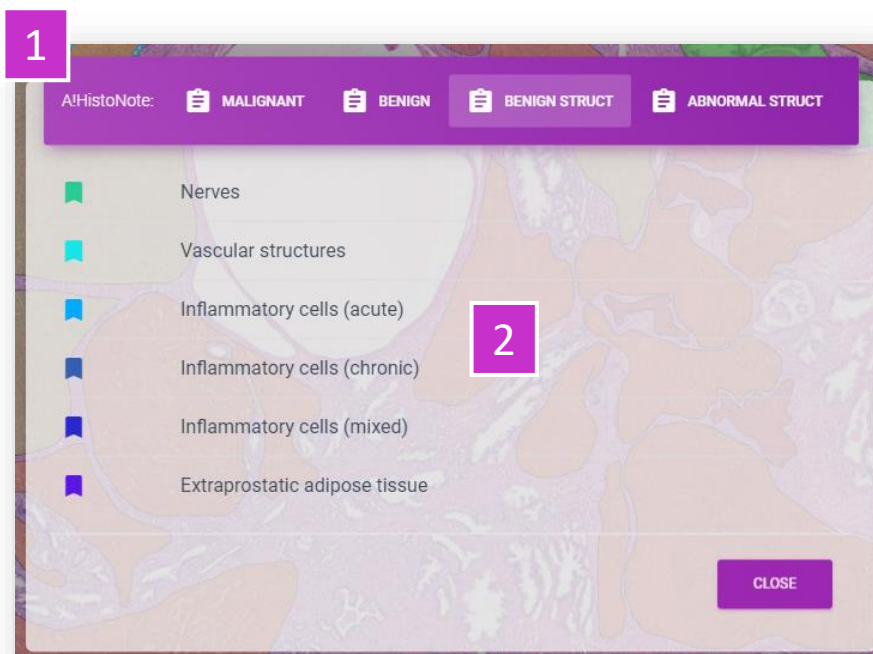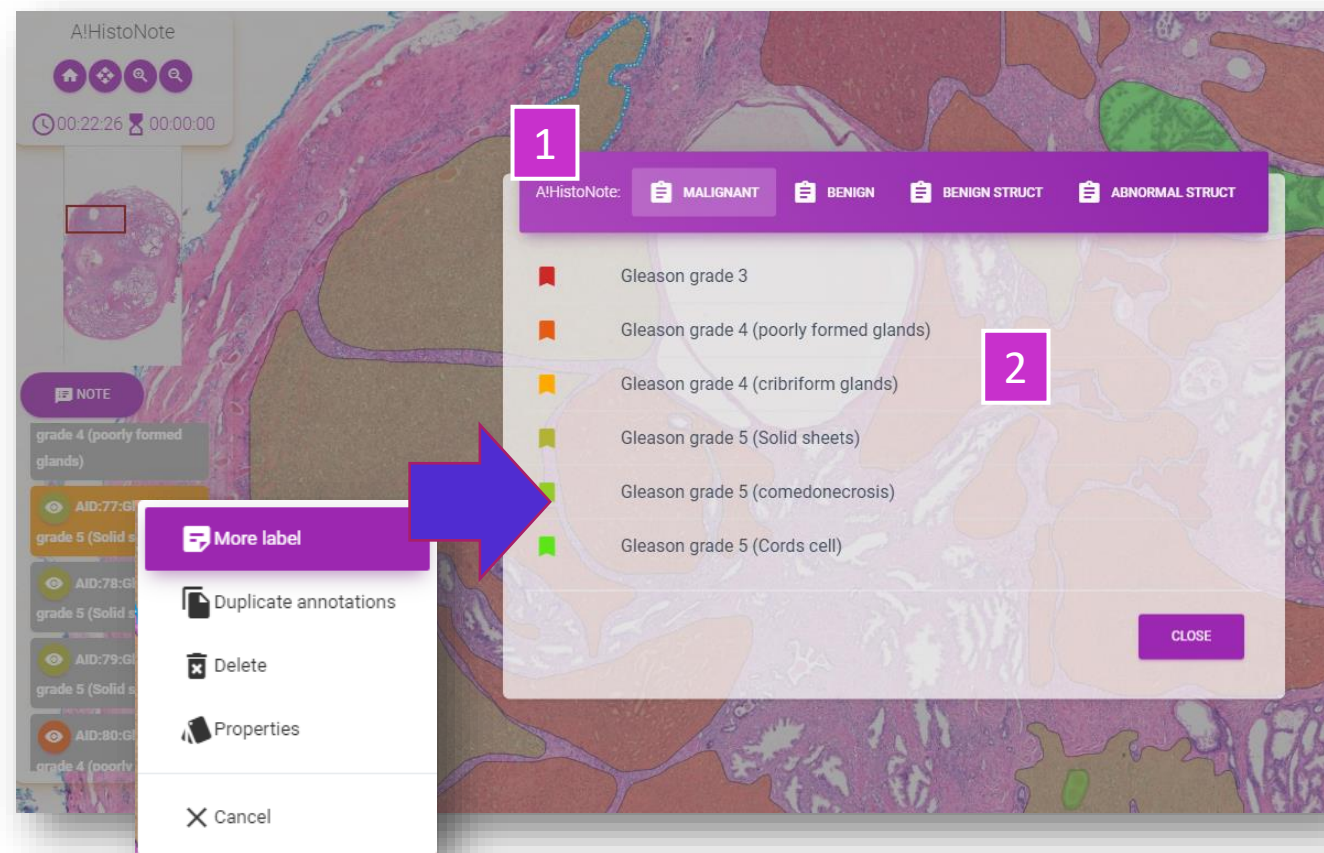

# 2 A!HistoNote Dropdown menu

## [Duplicate annotations] in the Dropdown Menu

1. Original ROI
2. Duplicated ROI

*PS: Except ROI-ID, all information about ROI labels and remarks will be copied*

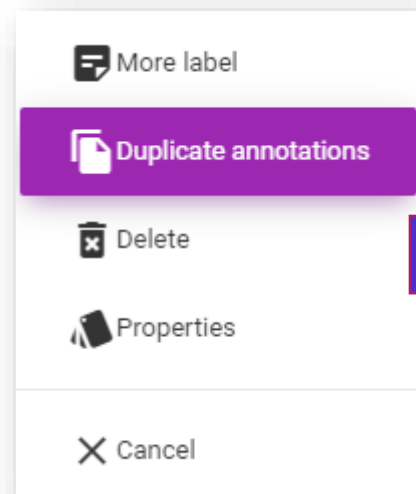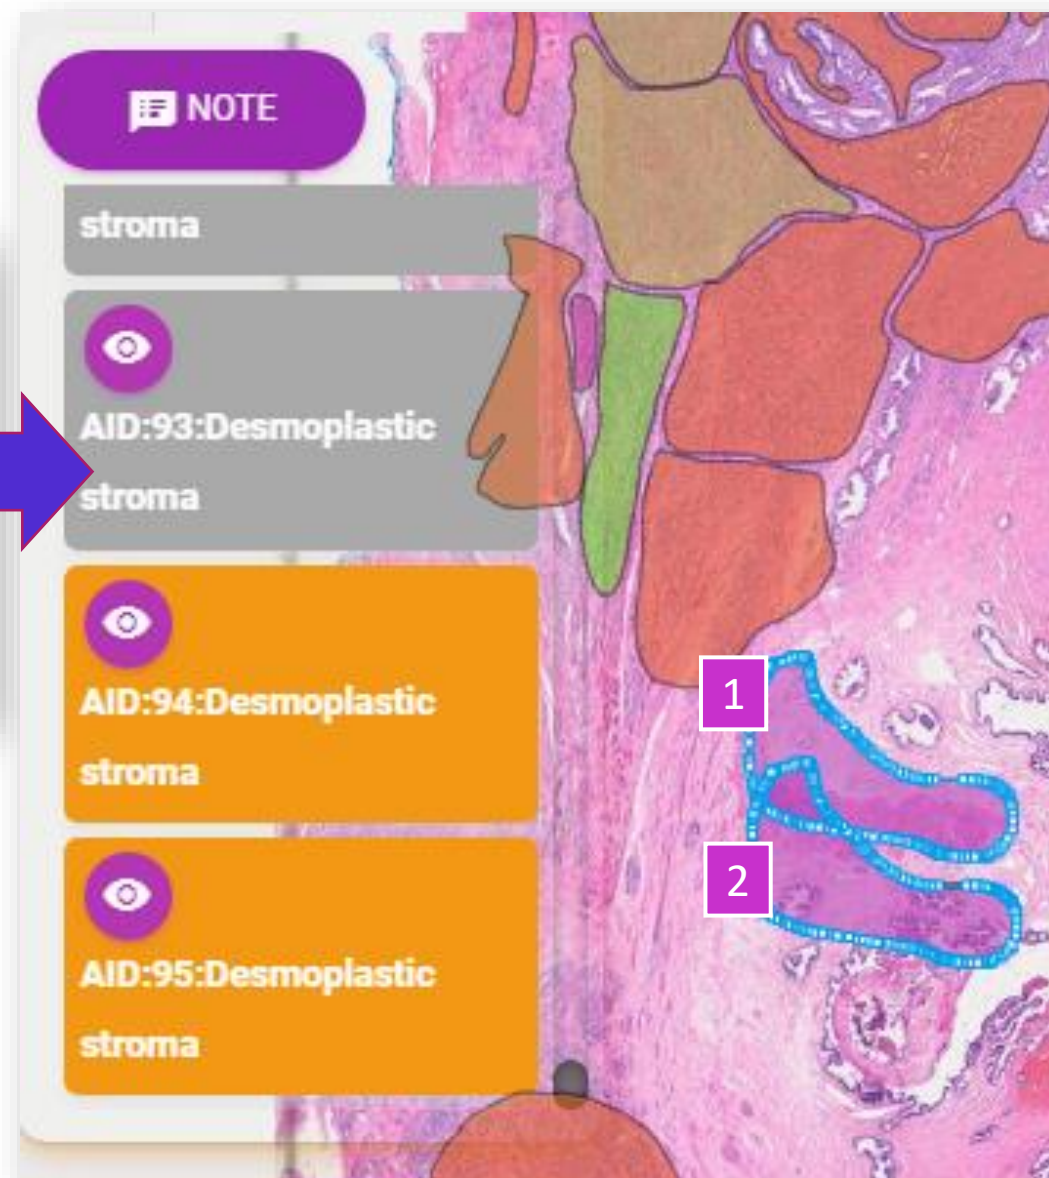

# 2 A!HistoNote Dropdown menu

## [Delete] in the drop-down menu

Original ROI

1. Select the ROI you want to delete
2. Delete confirmation dialogue

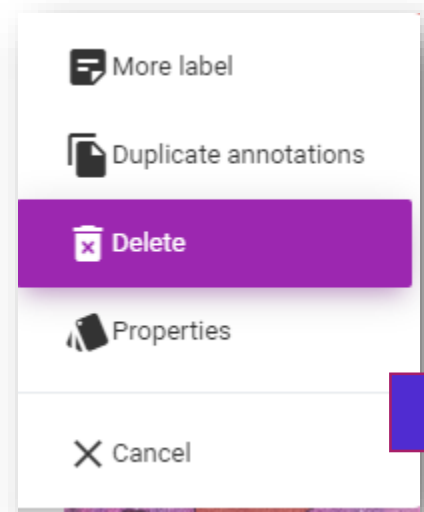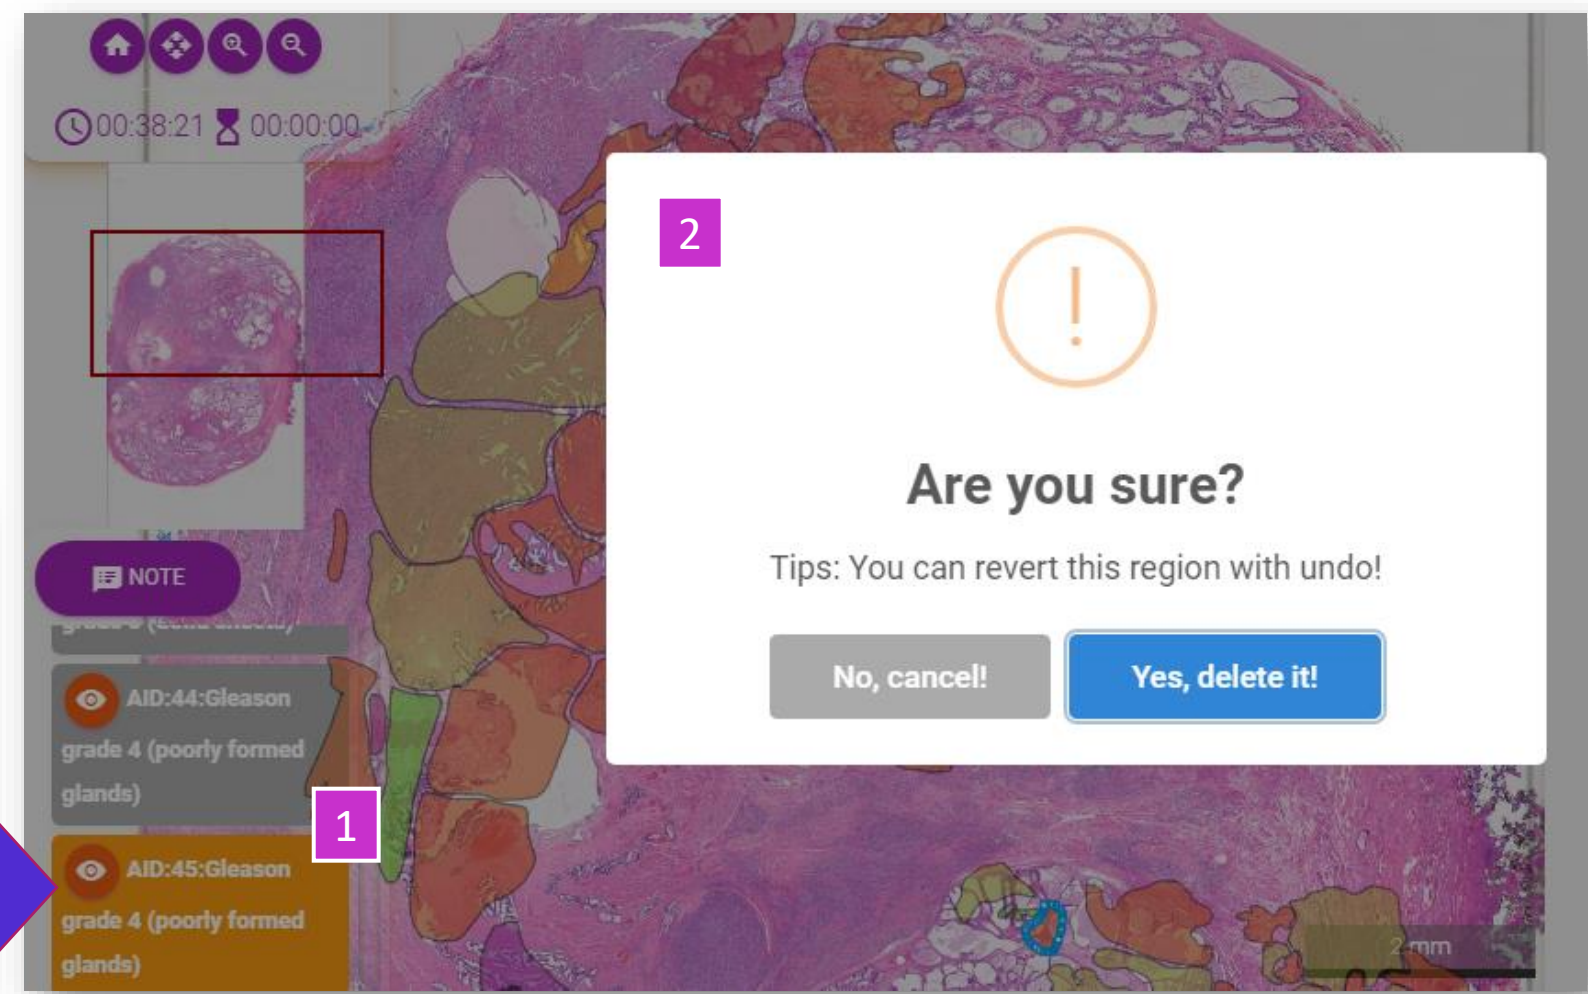

# 2 A!HistoNote Dropdown menu

## [Properties] in the Dropdown Menu

1. Change the colour of the ROI border
2. Change the stroke size of the ROI border.
3. Change the transparency of the ROI body.
4. Record the remark/description

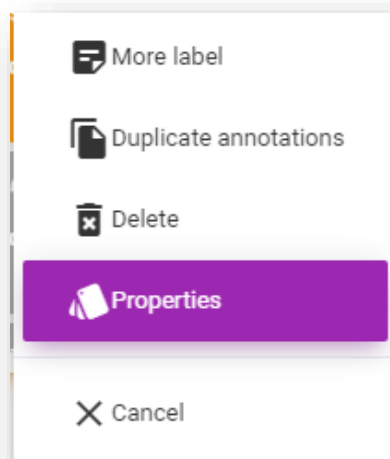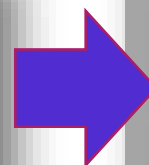
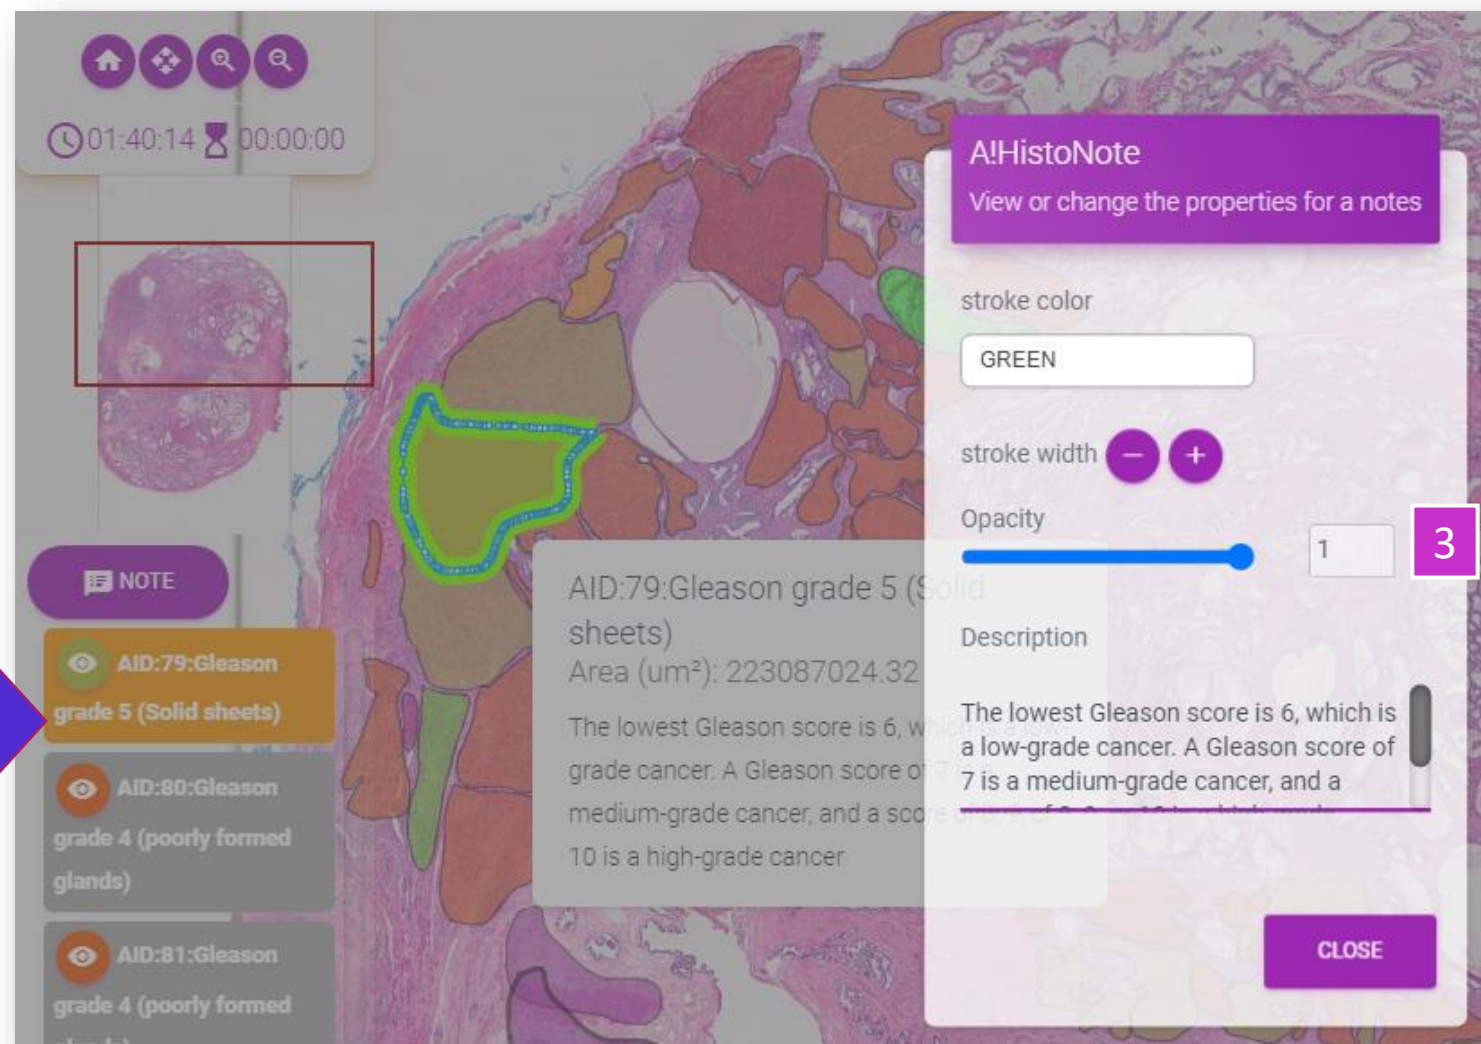

**A!HistoNote**  
View or change the properties for a notes

stroke color  
GREEN

stroke width − +

Opacity 1 **3**

Description  
The lowest Gleason score is 6, which is a low-grade cancer. A Gleason score of 7 is a medium-grade cancer, and a

**CLOSE**

**NOTE**

- AID:79:Gleason grade 5 (Solid sheets)
- AID:80:Gleason grade 4 (poorly formed glands)
- AID:81:Gleason grade 4 (poorly formed glands)

AID:79:Gleason grade 5 (Solid sheets)  
Area (um<sup>2</sup>): 223087024.32  
The lowest Gleason score is 6, which is a low-grade cancer. A Gleason score of 7 is a medium-grade cancer, and a score of 10 is a high-grade cancer

# 3 A!HistoNote ROI Tools

## Annotation tools

1. ROI picker
2. Free-hand draw tool
3. Polygon draw tool
4. Brush draw tool
5. Measurement tool
6. Delete ROI

## Image adjustment tools

7. Image filtering tool
8. Image metadata viewer

## General tools

9. Save ROI

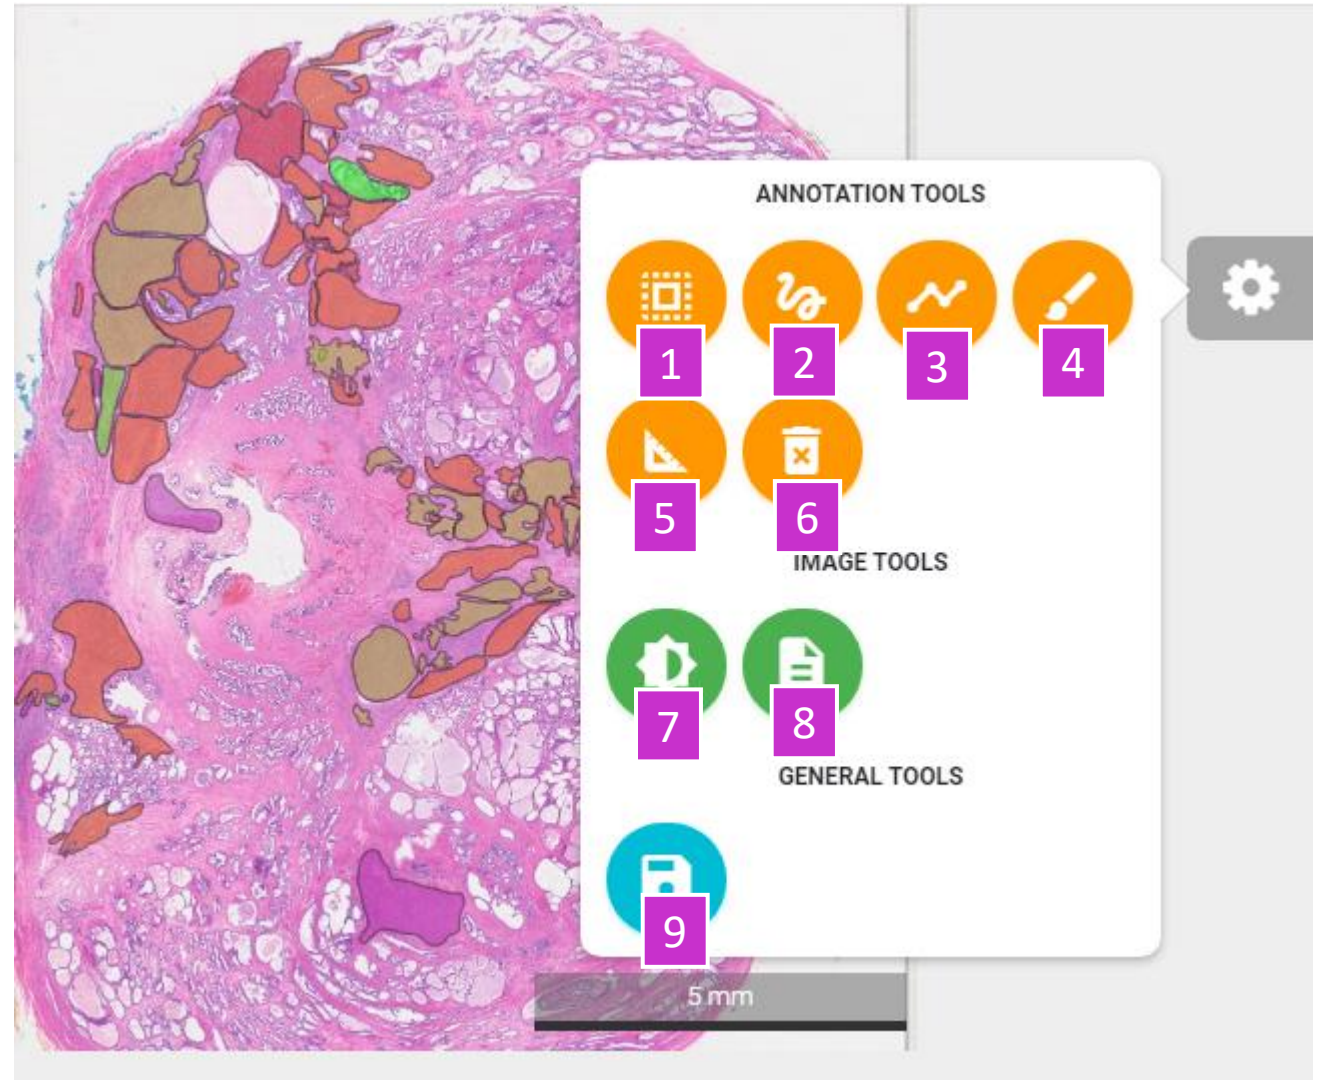

# 3.1 A!HistoNote ROI Tools

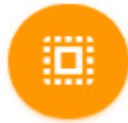

## ROI Picker

1. The location of the original target ROI.
2. Click the mouse to drag and move to the desired position on the target ROI.

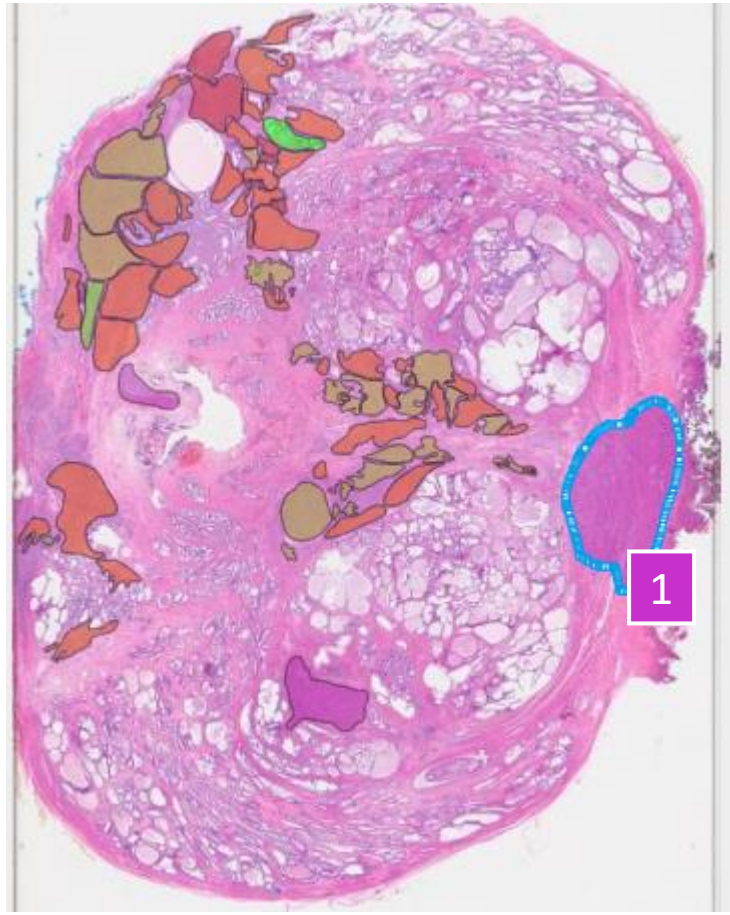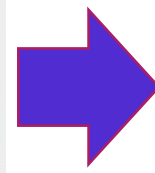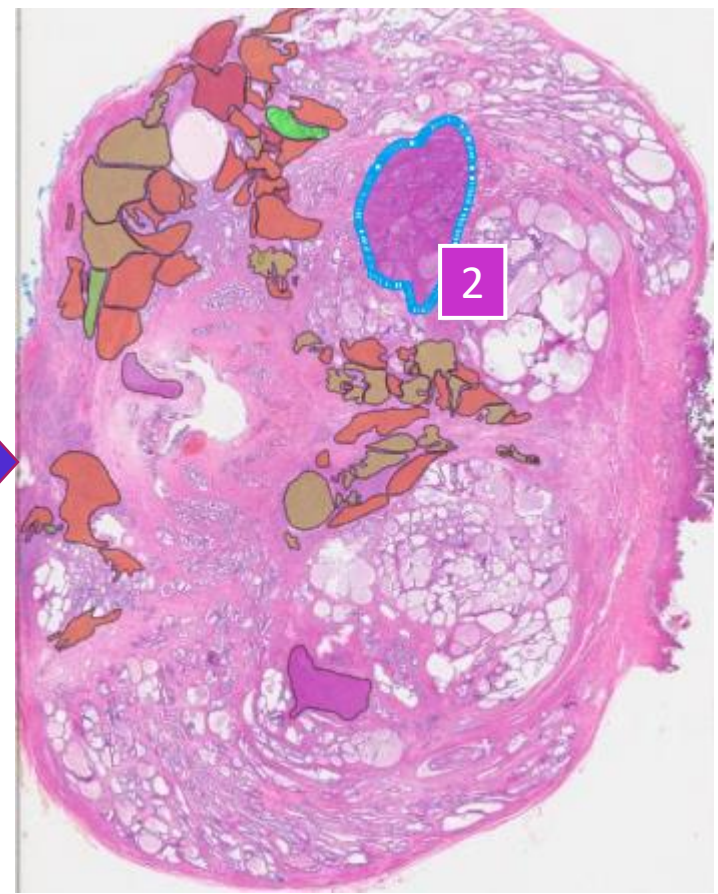

# 3.1 A!HistoNote ROI Tools

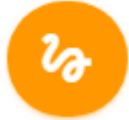

## Free-hand draw tool

1. The location of the original target ROI.
2. Click the mouse to drag and move on the edge according to the shape of the entire targeted region.
3. Release mouse click to obtain the ROI.

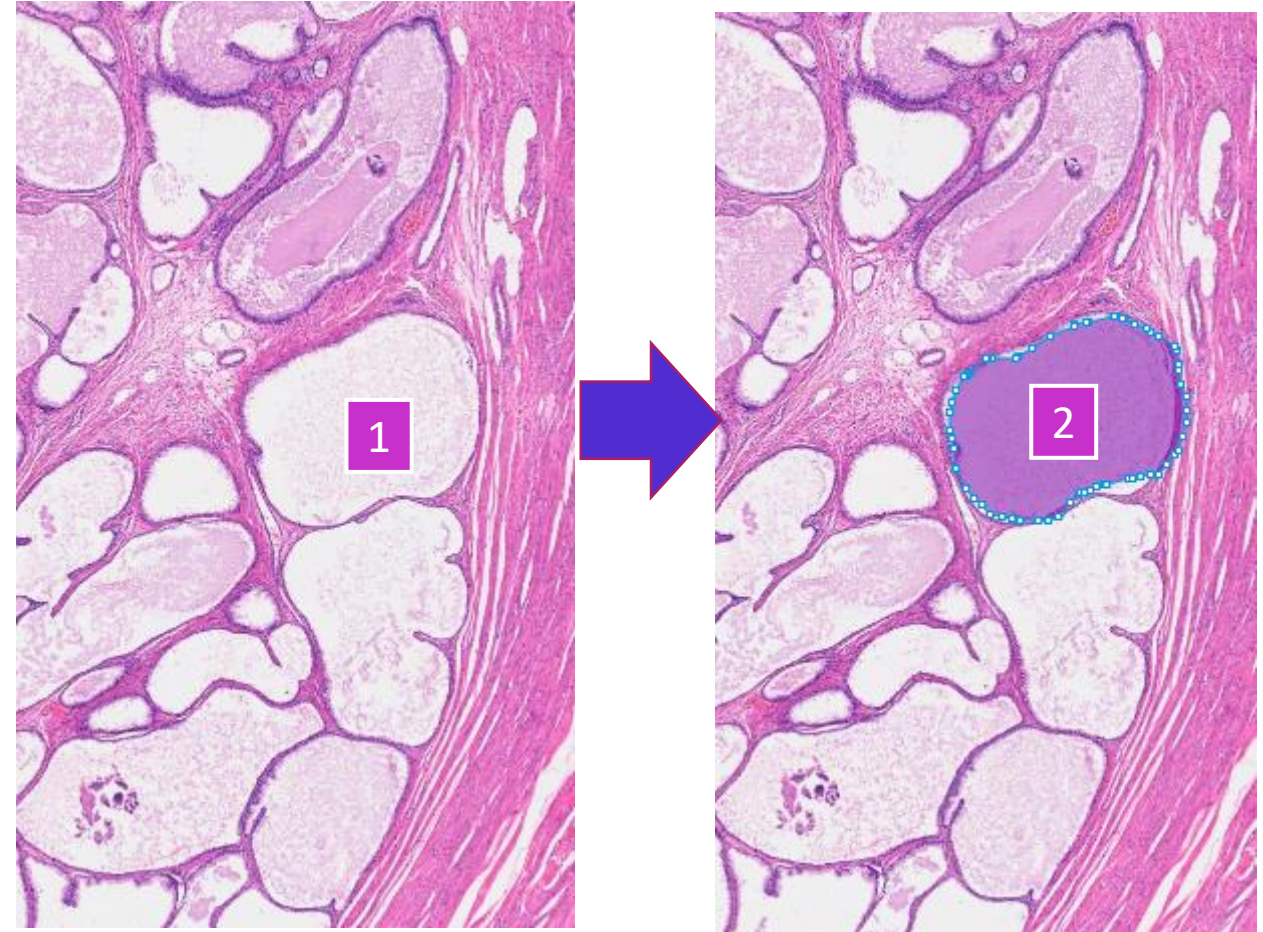

# 3.1 A!HistoNote ROI Tools

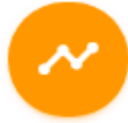

## Polygon draw tool

1. The location of the original target ROI.
2. Click the mouse on the edge according to the shape of the entire target area.
3. Double mouse click to obtain the ROI.

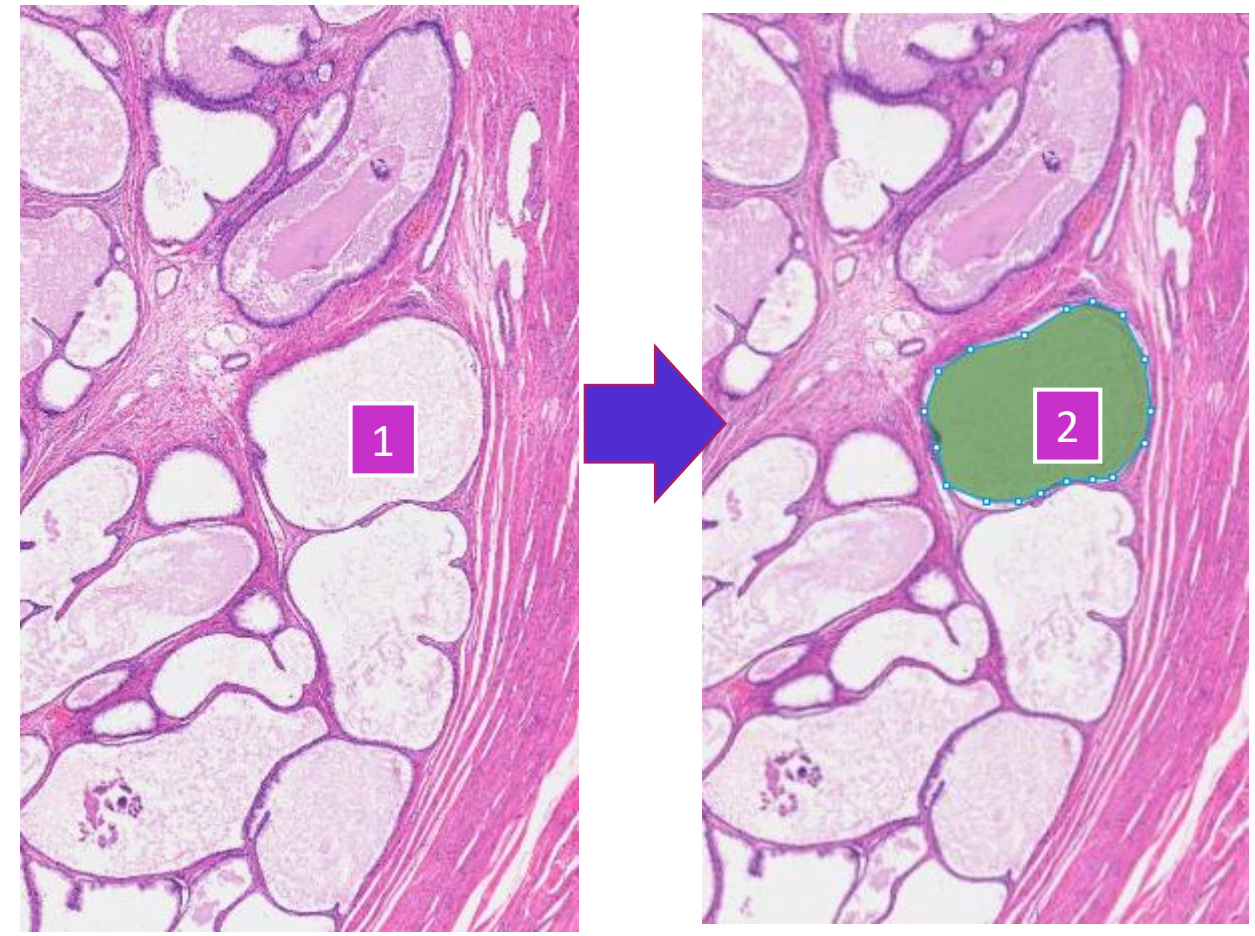

# 3.1 A!HistoNote ROI Tools

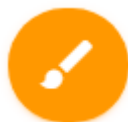

## Brush draw tool

1. Set brush size according to the approximate and less than target size.
2. The round yellow highlight shows the **estimated size**.
3. Close the window or leave it alone.
4. The location of the target ROI.
5. Drag and move the mouse carefully (yellow highlighter) within the shape of the entire target area.
6. Release mouse click to obtain the ROI.

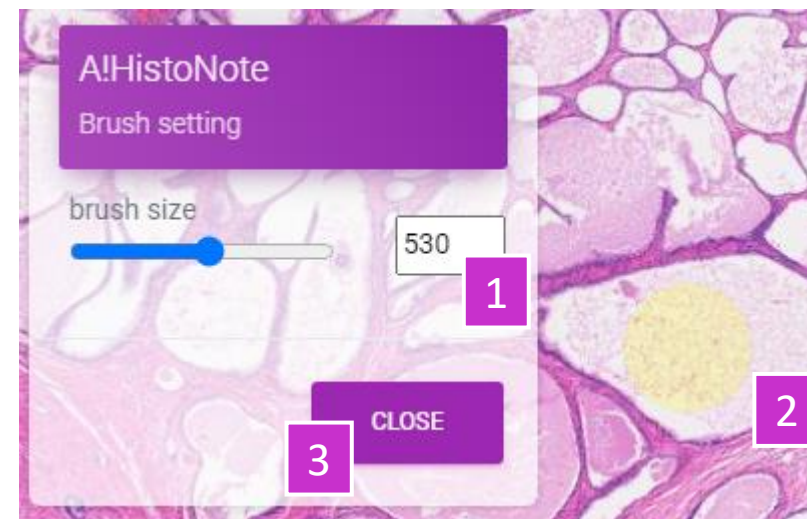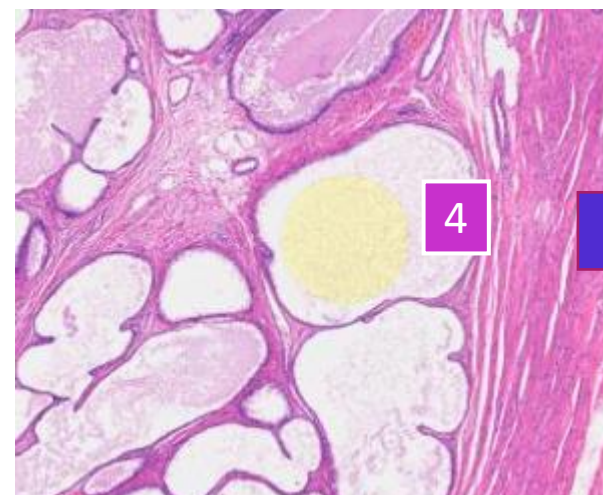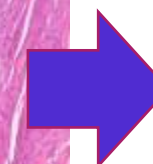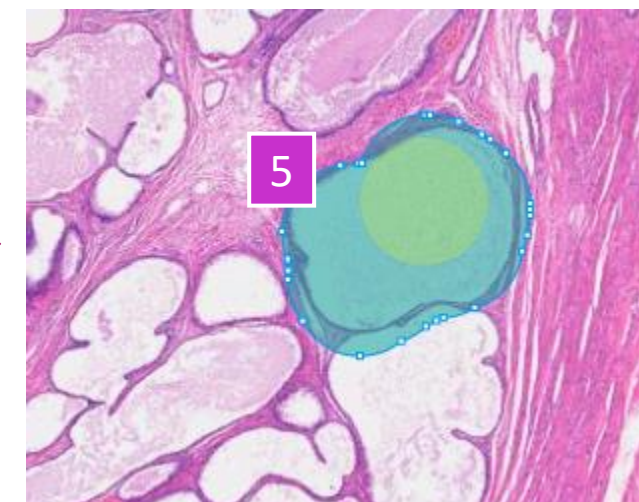

# 3.1 A!HistoNote ROI Tools

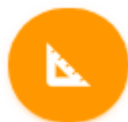

## Measurement tools

1. A circle (radius area) is displayed when the ruler is measuring.
2. An angle value is displayed when the ruler is measuring.
3. During the ruler measurement, the X (horizontal) and Y (vertical) lengths from the starting point to the target point are displayed.
4. Display text in either black or white font.

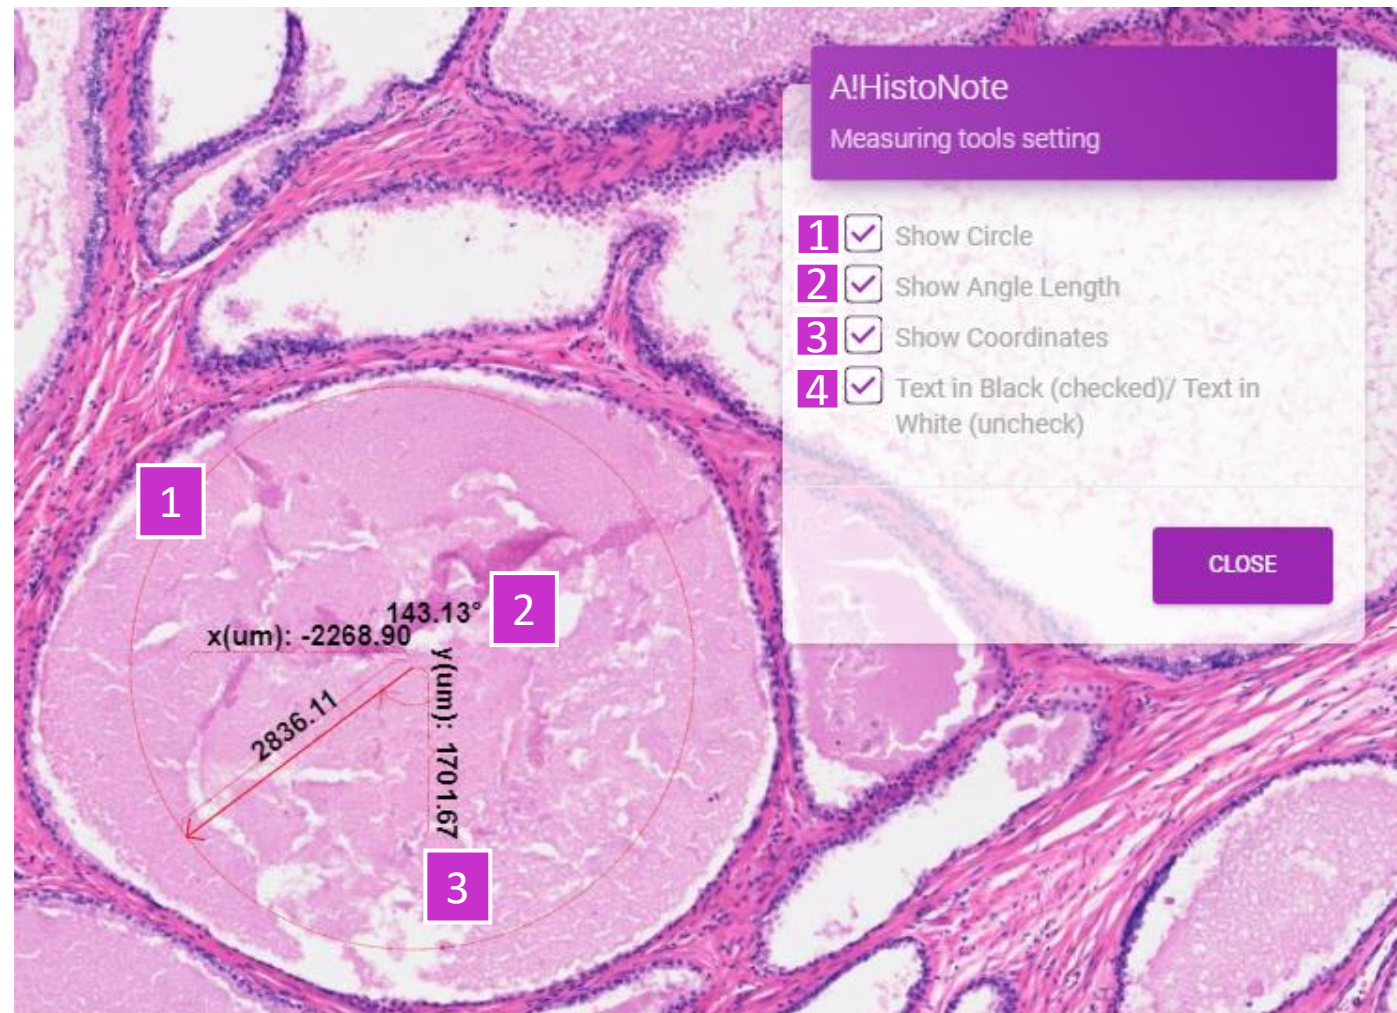

# 3.1 A!HistoNote ROI Tools

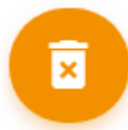

## Delete tools

1. Select target ROI and click
2. Confirmation window
3. Deleting status
4. Target ROI deleted

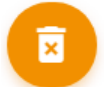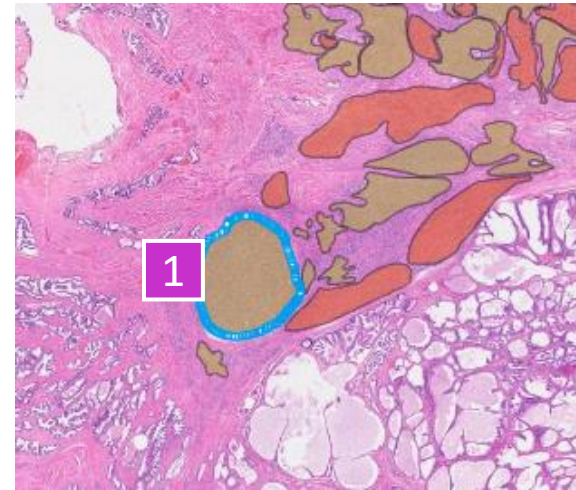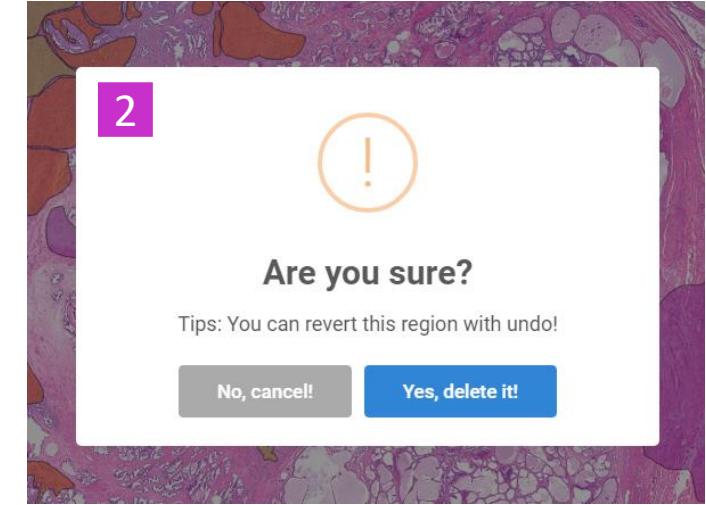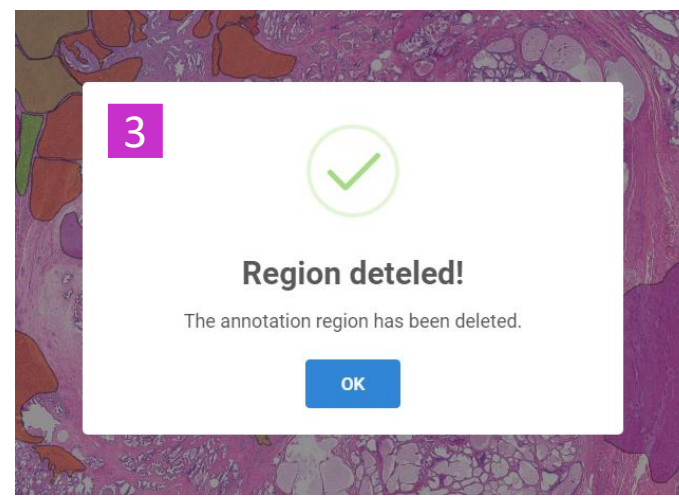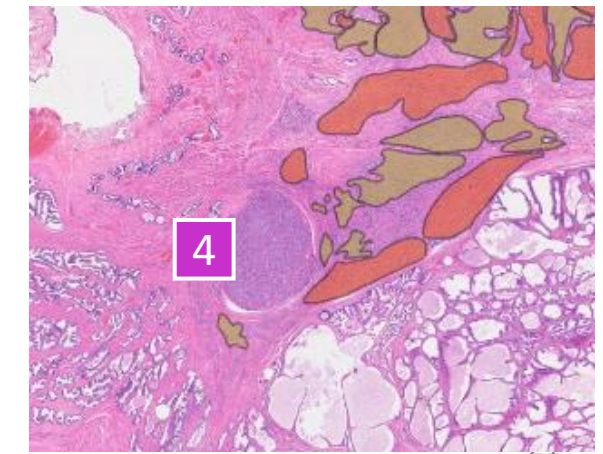

# 3.2 A!HistoNote Image Tools

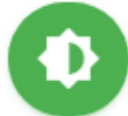

## Image Filter tools

1. Contrast
2. Brightness
3. Gama
4. Grayscale
5. Invert

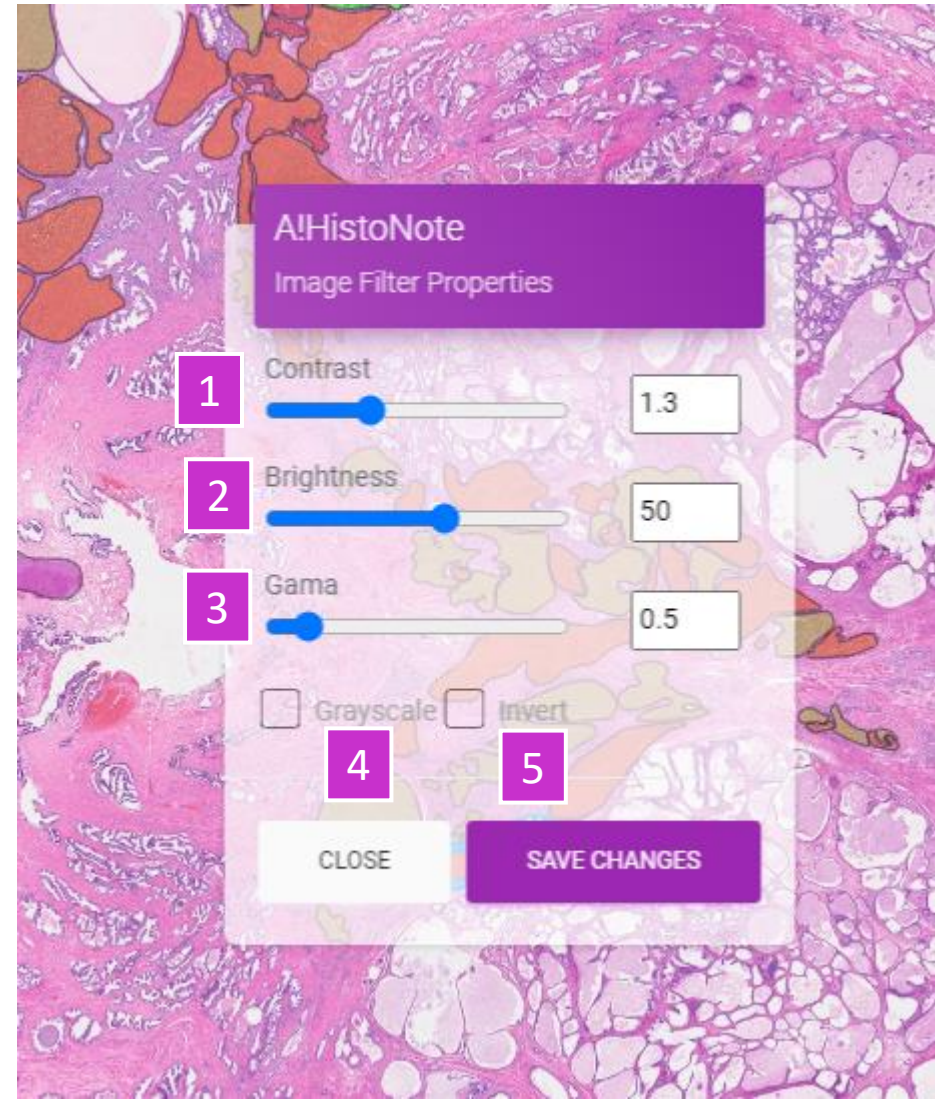

# 3.2 A!HistoNote Image Tools



## Samples of Filter Tools

1. Contrast
2. Brightness
3. Gama
4. Grayscale
5. Invert

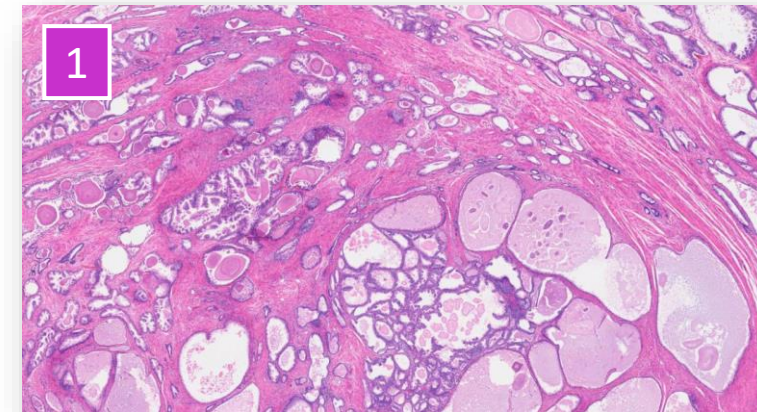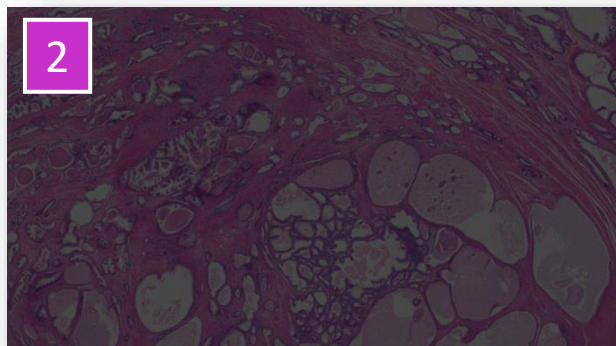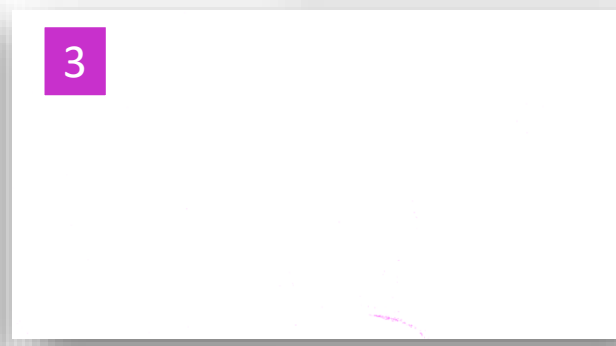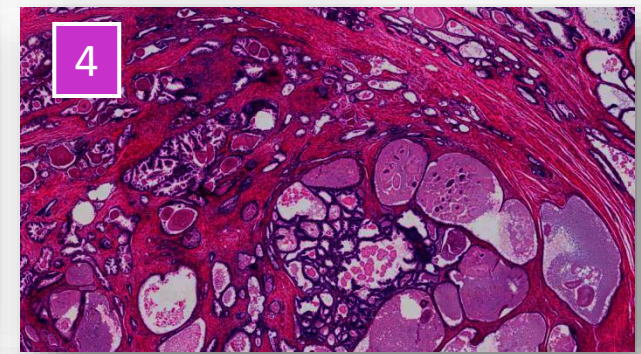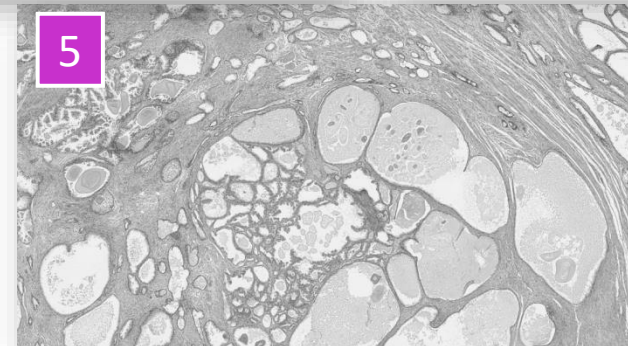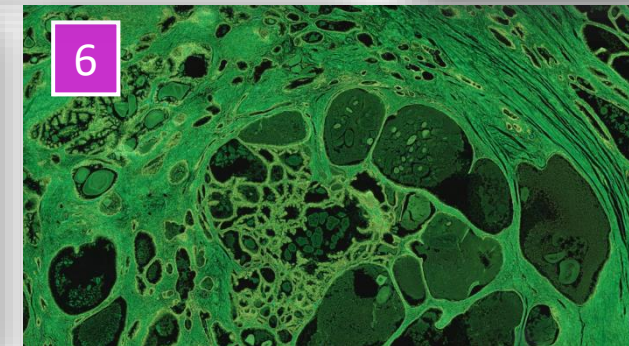

# 3.2 A!HistoNote Image Tools

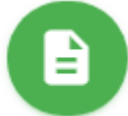

## Meta-data tools

1. Image information window
2. Full file name
3. Width of image in pixels
4. Height of image in pixels

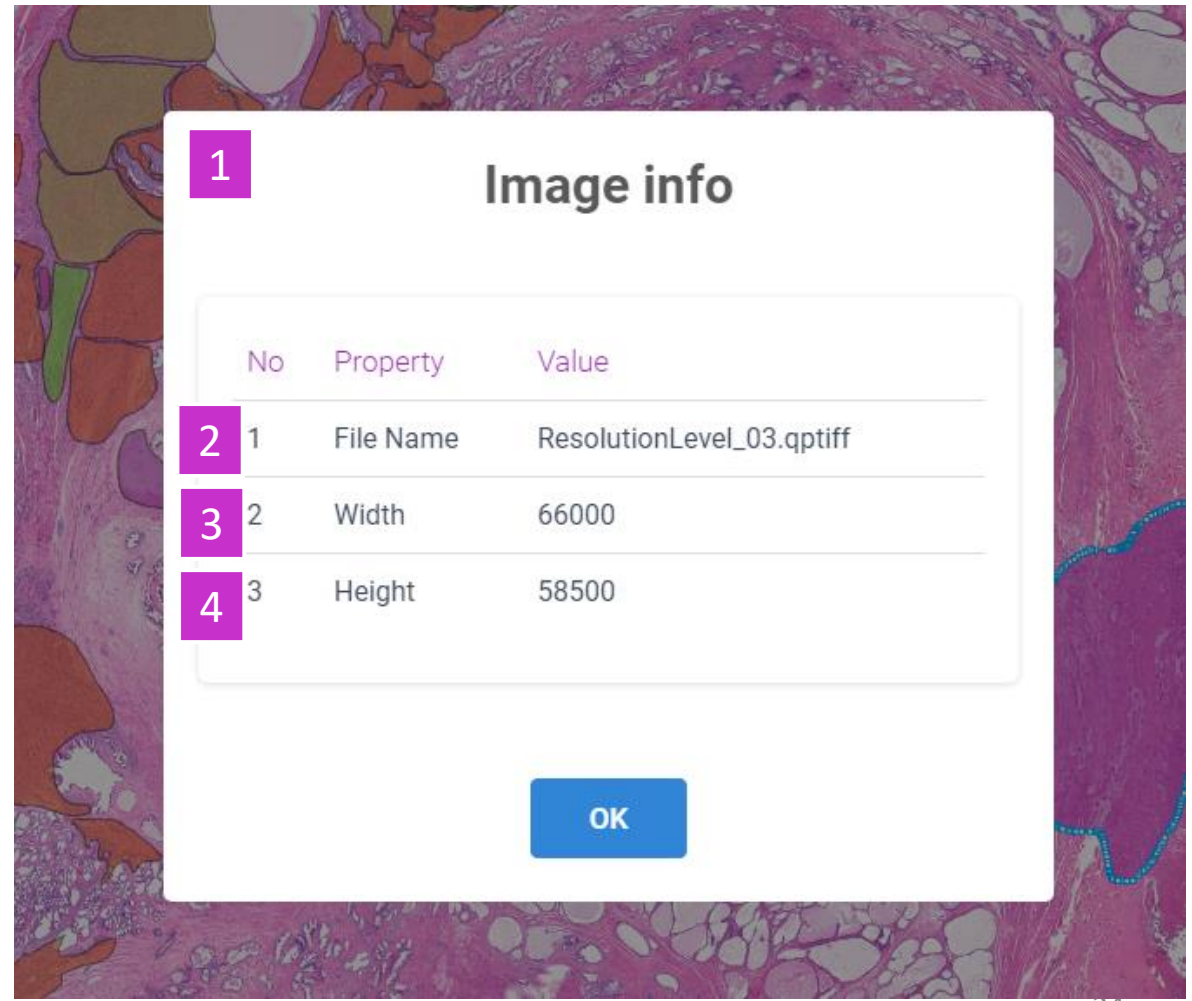

# 3.3 A!HistoNote General Tools

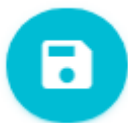

## Save ROI tools

1. Save ROI confirmation dialogue
2. Communicate with server
3. ROI successfully saved

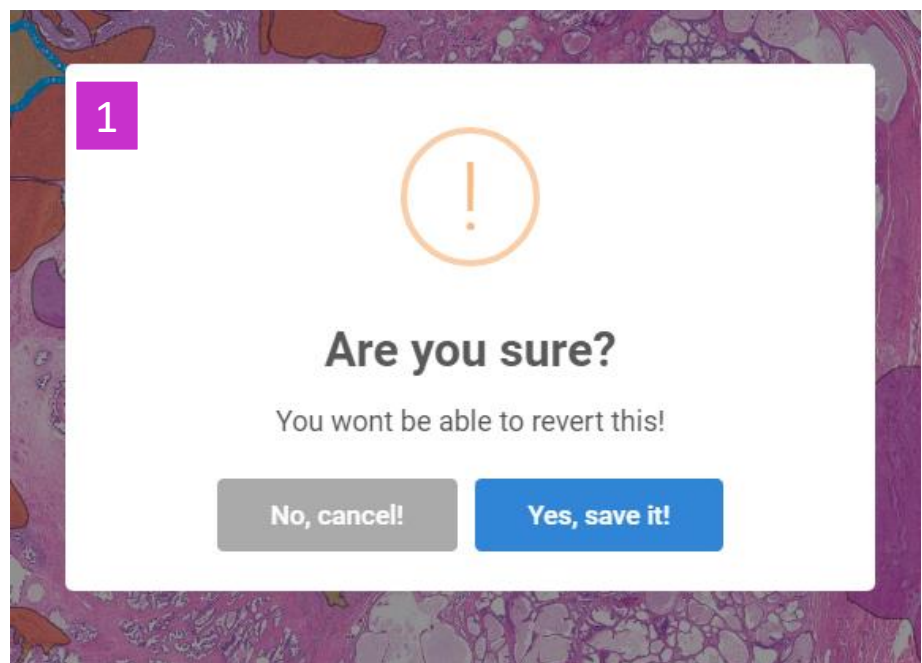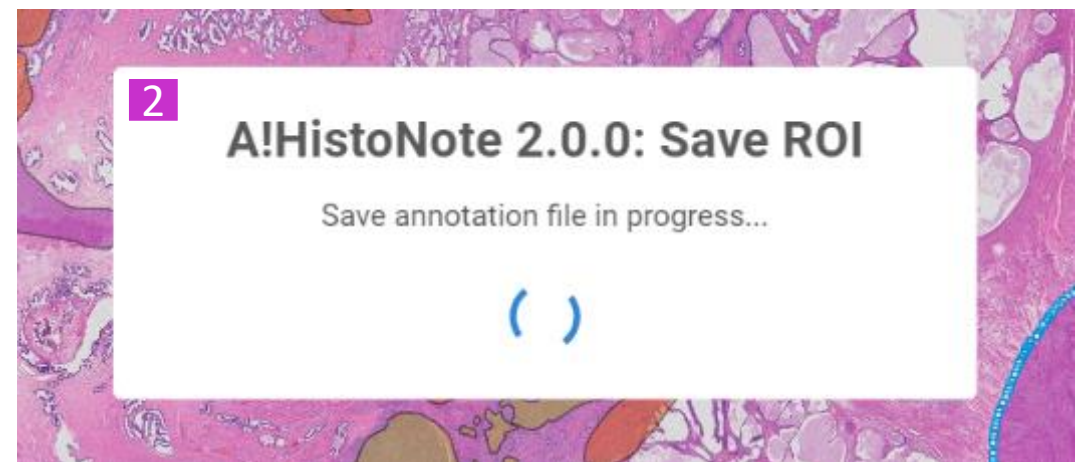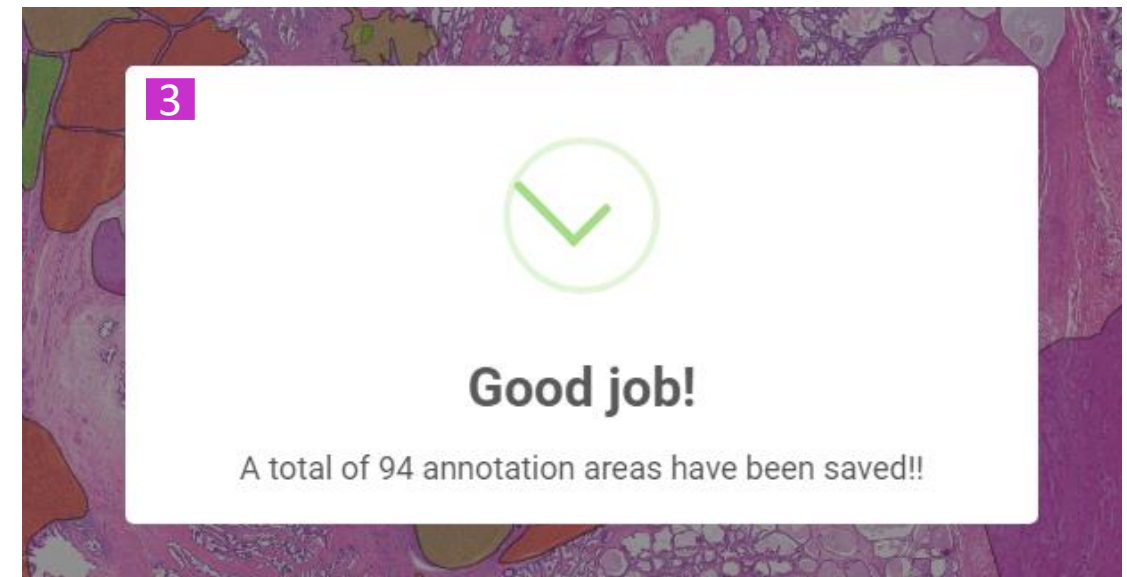

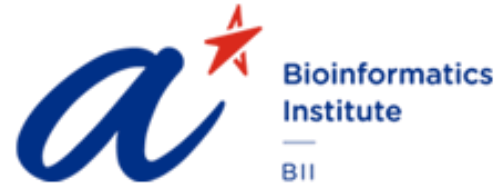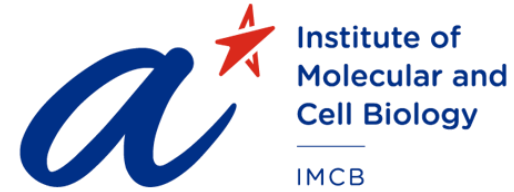

# Contact Us

30 Biopolis Street,  
#07-46 Matrix,  
Singapore 138671

# Thank you

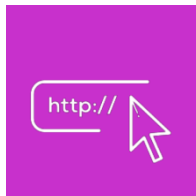

<https://www.a-star.edu.sg/imcb/>  
<https://www.a-star.edu.sg/bii/>

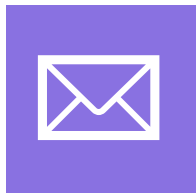

[yu\\_weimiao@bii.a-star.edu.sg](mailto:yu_weimiao@bii.a-star.edu.sg) / [wmyu@imcb.a-star.edu.sg](mailto:wmyu@imcb.a-star.edu.sg)

[kh.ong@aimagino.com](mailto:kh.ong@aimagino.com) / [ong\\_kok\\_haur@bii.a-star.edu.sg](mailto:ong_kok_haur@bii.a-star.edu.sg)

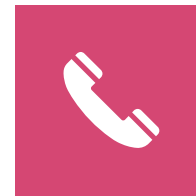

+65 6586 9912
